# Supplementary material for: Synthetic lethality by targeting the RUVBL1/2-TTT complex in mTORC1-hyperactive cancer cells
Source: PubMed Central journal article supplement — Sci Adv. 2020 Jul 31;6(31):eaay9131. doi: 10.1126/sciadv.aay9131 (PMC7399646; doi:10.1126/sciadv.aay9131), 2020-07-31
Supplement: aay9131_SM.pdf [file aay9131_SM.pdf]

## Supplementary Materials for

### **Synthetic lethality by targeting the RUVBL1/2-TTT complex in mTORC1-hyperactive cancer cells**

Seung Ho Shin, Ji Su Lee, Jia-Min Zhang, Sungbin Choi, Zarko V. Boskovic, Ran Zhao, Mengqiu Song, Rui Wang, Jie Tian, Mee-Hyun Lee, Jae Hwan Kim, Minju Jeong, Jung Hyun Lee, Michael Petukhov, Sam W. Lee, Sang Gyun Kim, Lee Zou, Sanguine Byun\*

\*Corresponding author. Email: [sanguine@yonsei.ac.kr](mailto:sanguine@yonsei.ac.kr)

Published 31 July 2020, *Sci. Adv.* **6**, eaay9131 (2020)  
DOI: 10.1126/sciadv.aay9131

#### **This PDF file includes:**

Figs. S1 to S10  
Table S1

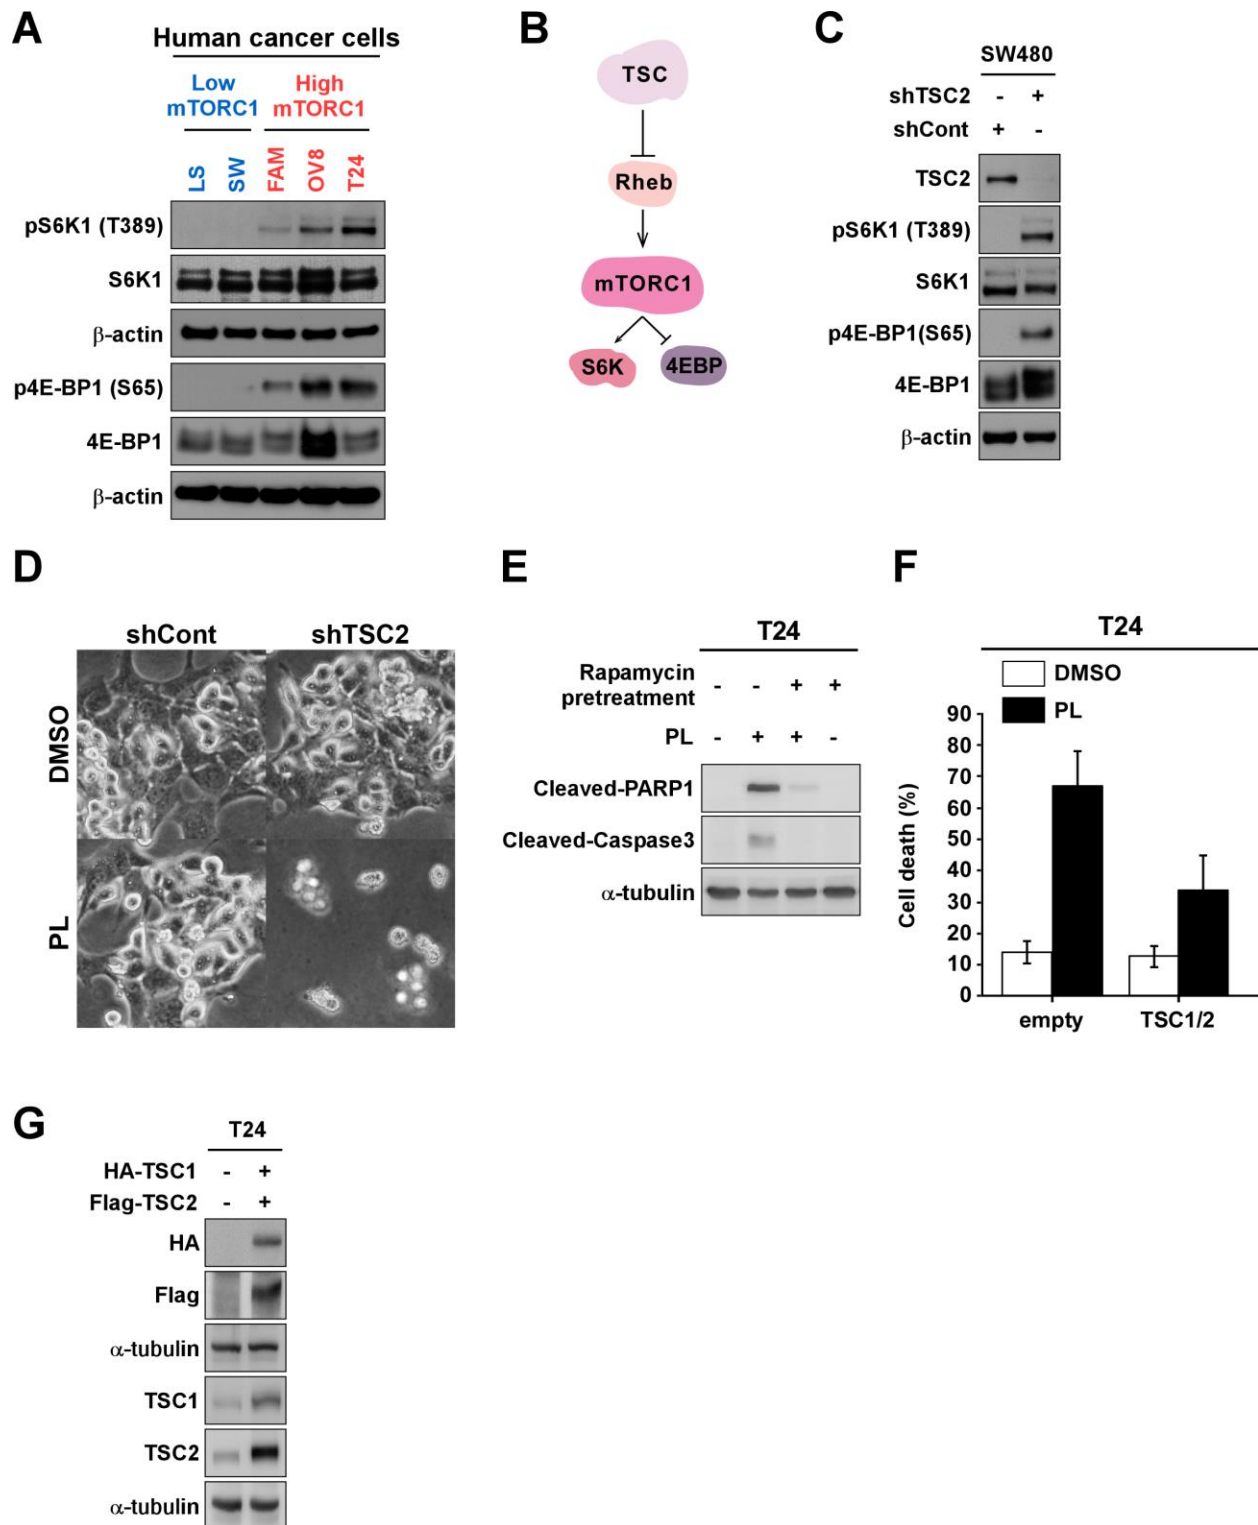

**Fig. S1. mTORC1 activity in various cells and effect of PL on cell viability depending on mTORC1 activity.** (A) Human cancer cells with varying degree of mTORC1 activity. Human cancer cells with low-mTORC1 activity (LS, LS174T; SW, SW480) and high-mTORC1 activity (FAM, FAMPAC; OV8, OVCAR-8; T24) are shown. (B) The TSC complex is a key negative regulator of mTORC1 signaling

through the deactivation of Rheb, an indispensable factor for mTORC1 activation. When activated, mTORC1 phosphorylates S6K1 and 4E-BP1. **(C)** Knockdown of TSC2 in SW480 cells increases mTORC1 activity. **(D)** Effect of PL on SW480 shControl and SW480 shTSC2 cell viability. SW480 shControl and SW480 shTSC2 cells were treated with PL (10  $\mu$ M) for cell death measurement. Representative pictures were taken before measurement of cell death. **(E)** Pretreatment of rapamycin (16 hr) blocks PL-induced apoptosis markers. **(F)** Effect of PL on TSC1/2-overexpressed T24 cell viability. 48 hr after TSC1/2 transfection to T24 cells, PL (10  $\mu$ M) was treated for cell death measurement. **(G)** Overexpression of TSC1/2 was confirmed by immunoblotting.

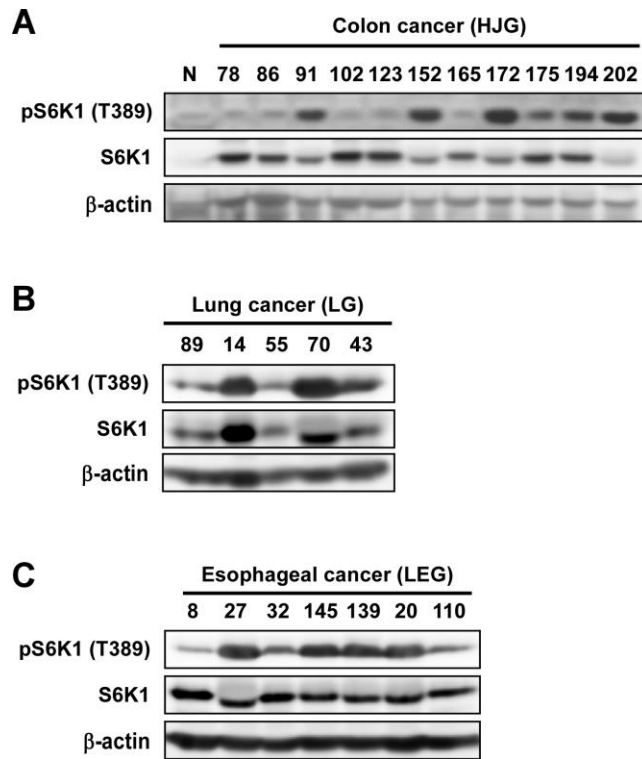

**Fig. S2. Analysis of p70S6K1 phosphorylation levels in patient-derived tumor tissues.** p-p70S6K1 and p70S6K1 levels of (A) colon, (B) lung and (C) esophageal cancer PDX tumors were measured by immunoblotting.

|           | Unique A | Total A | Unique B | Total B |          | Unique A | Total A | Unique B | Total B |         | Unique A | Total A | Unique B | Total B |
|-----------|----------|---------|----------|---------|----------|----------|---------|----------|---------|---------|----------|---------|----------|---------|
| ACACA     | 10       | 11      | 9        | 13      | HARS     | 8        | 10      | 3        | 3       | PDIA6   | 13       | 17      | 10       | 10      |
| ACLY      | 8        | 8       | 7        | 9       | HAT1     | 9        | 13      | 3        | 3       | PGLS    | 6        | 8       | 1        | 1       |
| ACTA2     | 8        | 15      | 8        | 17      | HNRNPF   | 8        | 12      | 5        | 5       | PHGDH   | 11       | 12      | 0        | 0       |
| ADA       | 9        | 10      | 0        | 0       | HNRNPH1  | 6        | 10      | 5        | 7       | PKM     | 19       | 23      | 13       | 18      |
| AHCY      | 6        | 6       | 4        | 4       | HNRNPK   | 16       | 24      | 10       | 12      | PLIN3   | 15       | 21      | 9        | 11      |
| AHNAK     | 12       | 16      | 14       | 20      | HSD17B4  | 8        | 9       | 7        | 10      | POLD1   | 6        | 7       | 2        | 2       |
| ALDOA     | 6        | 7       | 2        | 2       | HSP90AA1 | 8        | 11      | 3        | 3       | PPA1    | 6        | 8       | 2        | 2       |
| ANXA1     | 9        | 13      | 2        | 3       | HSP90B1  | 6        | 6       | 1        | 1       | PPIA    | 12       | 14      | 11       | 12      |
| ANXA2     | 26       | 41      | 21       | 34      | HSPA1L   | 7        | 17      | 4        | 8       | PPP2R1A | 6        | 6       | 1        | 1       |
| ASNS      | 7        | 8       | 5        | 5       | HSPA2    | 6        | 10      | 4        | 7       | PRDX1   | 14       | 26      | 15       | 27      |
| ATP5A1    | 6        | 6       | 2        | 2       | HSPA5    | 20       | 51      | 17       | 38      | PRMT1   | 10       | 11      | 3        | 3       |
| ATP6V1A   | 9        | 14      | 4        | 5       | HSPA8    | 16       | 42      | 11       | 28      | PSMD2   | 7        | 10      | 4        | 4       |
| ATXN10    | 8        | 8       | 1        | 1       | HSPA9    | 10       | 21      | 6        | 10      | PSME2   | 7        | 8       | 1        | 1       |
| CAD       | 10       | 11      | 4        | 5       | HSPBP1   | 6        | 8       | 0        | 0       | PYGB    | 6        | 6       | 5        | 6       |
| CBR1      | 6        | 6       | 0        | 0       | HSPD1    | 24       | 36      | 16       | 20      | RARS    | 11       | 22      | 8        | 16      |
| CCT8      | 7        | 7       | 3        | 3       | IARS     | 10       | 12      | 11       | 15      | RBBP4   | 6        | 7       | 0        | 0       |
| CDK6      | 6        | 6       | 2        | 3       | IDH3B    | 6        | 7       | 4        | 5       | RCC2    | 7        | 7       | 4        | 4       |
| CDKN2AIP  | 7        | 9       | 2        | 2       | IPO5     | 9        | 14      | 1        | 2       | RPS3    | 10       | 15      | 6        | 10      |
| CFL1      | 6        | 8       | 4        | 4       | IQGAP1   | 18       | 23      | 8        | 12      | RPS3A   | 8        | 8       | 3        | 5       |
| CHEK1     | 16       | 21      | 1        | 1       | IRAK1    | 9        | 10      | 2        | 2       | RPS4X   | 6        | 7       | 0        | 0       |
| CLTC      | 10       | 12      | 8        | 12      | KARS     | 8        | 13      | 7        | 10      | RPS6KA1 | 6        | 8       | 0        | 0       |
| CNN2      | 6        | 8       | 3        | 3       | KHSRP    | 11       | 15      | 6        | 10      | RPS6KA3 | 9        | 9       | 0        | 0       |
| CNN3      | 8        | 10      | 3        | 3       | KPNA2    | 8        | 8       | 1        | 1       | RPS6KA4 | 11       | 12      | 1        | 1       |
| CORO1B    | 7        | 11      | 2        | 4       | LARS     | 7        | 7       | 7        | 9       | RRM1    | 6        | 9       | 3        | 3       |
| CRKL      | 9        | 11      | 0        | 0       | LDHA     | 6        | 7       | 3        | 6       | RUVBL1  | 7        | 8       | 3        | 3       |
| CSDE1     | 11       | 11      | 6        | 7       | LMNA     | 7        | 8       | 4        | 5       | RUVBL2  | 10       | 13      | 6        | 7       |
| CTPS1     | 7        | 12      | 4        | 8       | MAP4     | 12       | 16      | 9        | 11      | SAMHD1  | 6        | 12      | 4        | 6       |
| CTTN      | 16       | 22      | 4        | 4       | MARS     | 7        | 7       | 5        | 6       | SEC16A  | 6        | 8       | 1        | 2       |
| CUL5      | 11       | 11      | 0        | 0       | MAT2A    | 6        | 7       | 3        | 3       | SF3B3   | 9        | 11      | 4        | 4       |
| DARS      | 9        | 10      | 7        | 7       | MCM3     | 12       | 12      | 8        | 9       | SMC4    | 6        | 6       | 1        | 2       |
| DDB1      | 13       | 14      | 0        | 0       | MCM7     | 8        | 9       | 3        | 4       | SMTN    | 7        | 7       | 3        | 4       |
| DDX17     | 12       | 17      | 4        | 6       | MLKL     | 8        | 9       | 0        | 0       | SND1    | 9        | 10      | 5        | 7       |
| DDX3Y     | 6        | 8       | 4        | 7       | MSH2     | 6        | 7       | 3        | 4       | STAT1   | 6        | 7       | 1        | 1       |
| DHX15     | 22       | 30      | 3        | 4       | MTHFD1   | 19       | 20      | 13       | 13      | STAT3   | 7        | 8       | 3        | 3       |
| DHX9      | 7        | 7       | 4        | 4       | MTHFD1L  | 10       | 13      | 5        | 6       | TCAF1   | 6        | 7       | 3        | 3       |
| DKFZp686J | 8        | 10      | 7        | 7       | MYH9     | 18       | 20      | 6        | 7       | TMPO    | 11       | 18      | 6        | 8       |
| DNAJC10   | 22       | 53      | 0        | 0       | NCL      | 7        | 8       | 6        | 6       | TPM3    | 6        | 6       | 0        | 0       |
| DNAJC9    | 6        | 6       | 2        | 2       | NEK9     | 19       | 50      | 11       | 14      | TSG101  | 6        | 6       | 0        | 0       |
| DPYSL2    | 6        | 8       | 2        | 2       | NOSIP    | 7        | 7       | 2        | 3       | TTK     | 11       | 11      | 0        | 0       |
| EEF1A1    | 27       | 109     | 19       | 33      | NUDC     | 6        | 6       | 3        | 3       | TUBA1A  | 14       | 78      | 14       | 31      |
| EEF1G     | 6        | 8       | 4        | 4       | NUP155   | 6        | 9       | 2        | 2       | TUBB2A  | 17       | 77      | 11       | 45      |
| EEF2      | 19       | 28      | 0        | 0       | OGFR     | 11       | 19      | 4        | 4       | TUBB3   | 10       | 19      | 6        | 10      |
| EIF4A1    | 13       | 20      | 8        | 12      | OPA1     | 6        | 7       | 3        | 4       | TUBB6   | 6        | 9       | 4        | 5       |
| EML3      | 6        | 7       | 1        | 1       | PABPC1   | 7        | 12      | 5        | 9       | TXN     | 8        | 31      | 4        | 11      |
| ENO1      | 8        | 9       | 3        | 7       | PAICS    | 6        | 7       | 4        | 5       | TXNDC5  | 8        | 12      | 7        | 8       |
| EPRS      | 16       | 18      | 12       | 15      | PCBP1    | 7        | 9       | 2        | 2       | TXNL1   | 8        | 9       | 1        | 1       |
| FASN      | 23       | 30      | 17       | 24      | PCMT1    | 19       | 45      | 16       | 29      | UBA1    | 10       | 13      | 5        | 6       |
| FBXO22    | 7        | 7       | 1        | 1       | PCYT1A   | 6        | 6       | 1        | 1       | VIM     | 8        | 10      | 5        | 5       |
| FLNA      | 32       | 39      | 27       | 33      | PDCD6IP  | 22       | 26      | 10       | 12      | XPO1    | 7        | 11      | 3        | 6       |
| G6PD      | 8        | 8       | 2        | 2       | PDIA3    | 23       | 27      | 16       | 16      | XRCC5   | 7        | 10      | 4        | 4       |
| GART      | 8        | 10      | 6        | 8       | PDIA4    | 13       | 14      | 10       | 11      | ZC3HAV1 | 6        | 7       | 5        | 7       |

**Fig. S3. Mass spectrometry analysis on biotin-PL pull down.** 'A' indicates peptide counts for biotin-PL group and 'B' indicates peptides counts for free PL + biotin-PL group. Among candidates with unique peptide counts higher than 5 in the biotin-PL group, proteins that were reduced 40% or more after free PL competition were selected.

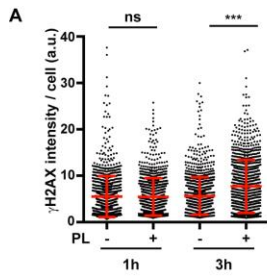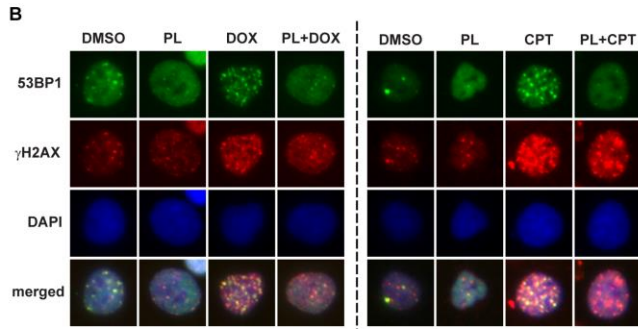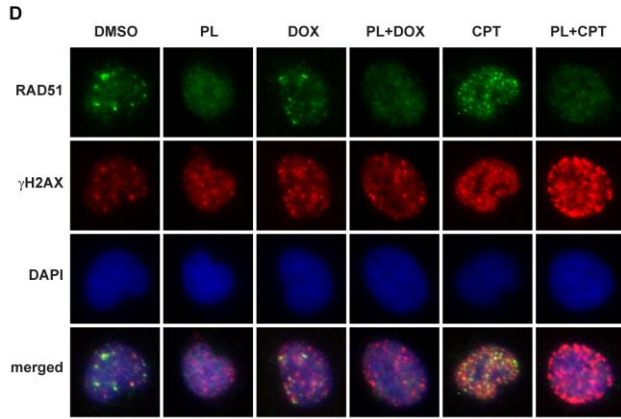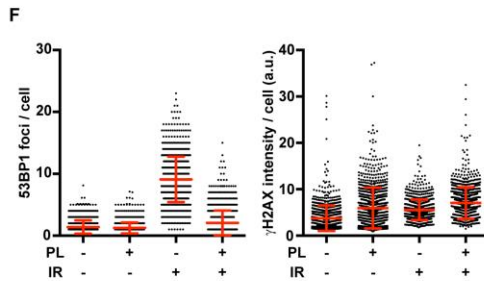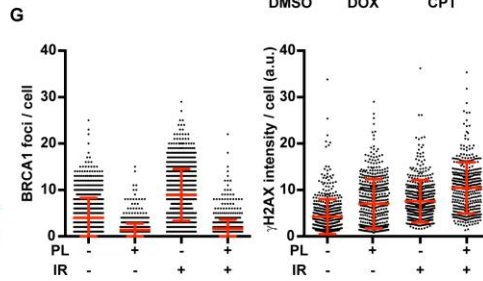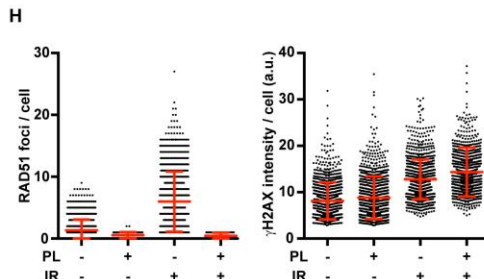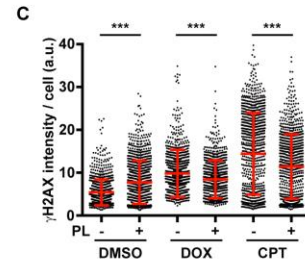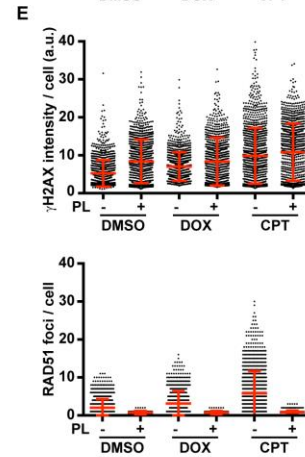

**Fig. S4. PL suppresses DNA damage responses.** (A) PL was incubated with the cells for 1h or 3h. (B) Representative images showing PL inhibits the foci formation of 53BP1 triggered by endogenous or exogenous DNA damages. The cells are pretreated with PL for 2hr before the addition of DOX (2  $\mu$ M) or CPT (1 $\mu$ M) for 1hr. The signal of  $\gamma$ H2AX and 53BP1 are monitored by immunofluorescence. Note: CPT majorly induces 53BP1 foci at G1 phase cells. The representative images of CPT-induced foci in G1 phase cells are selectively shown. (C) The intensity of  $\gamma$ H2AX and 53BP1 in cells from fig. S4B was measured, with each cell plotted individually. Mean  $\pm$  S.D. is shown. n = 1,000 cells for each condition. (D) Representative images showing PL inhibits the foci formation of RAD51 triggered by endogenous or exogenous DNA damages. The cells are pretreated with PL for 1hr before the addition of DOX (0.1  $\mu$ M) or CPT (0.05  $\mu$ M) for 3hr. The signal of  $\gamma$ H2AX and RAD51 are monitored by immunofluorescence. (E) The intensity of  $\gamma$ H2AX and RAD51 in cells from fig. S4D was measured, with each cell plotted individually. Mean  $\pm$  S.D. is shown. n = 1,000 cells for each condition. (F-H) The intensity of  $\gamma$ H2AX, 53BP1, BRCA1, and RAD51 in cells from Fig. 3F was measured and plotted individually. Mean  $\pm$  S.D. is shown. n = 1,000 cells for each condition. ns: not significant and  $***p < 0.001$ , (unpaired Student's t test).

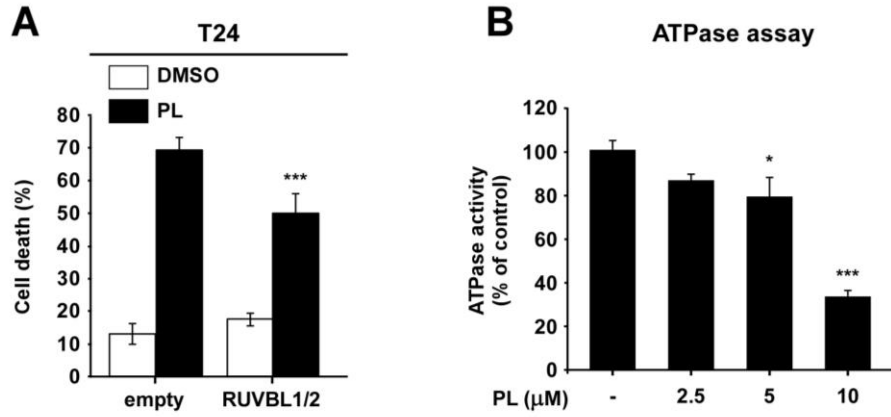

**Fig. S5. PL targets the RUVBL1/2-TTT complex.** (A) RUVBL1/2 overexpression reduces PL-mediated cell death. 48 hr after RUVBL1/2 transfection in T24 cells, PL (10 μM) was treated for cell death measurement. (B) The effect of PL on RUVBL1/2 ATPase activity. PL was added to RUVBL1/2 and ATPase activity was measured (\*,  $p < 0.05$ ; \*\*\*,  $p < 0.001$ , significant difference between PL treated and DMSO treated control).



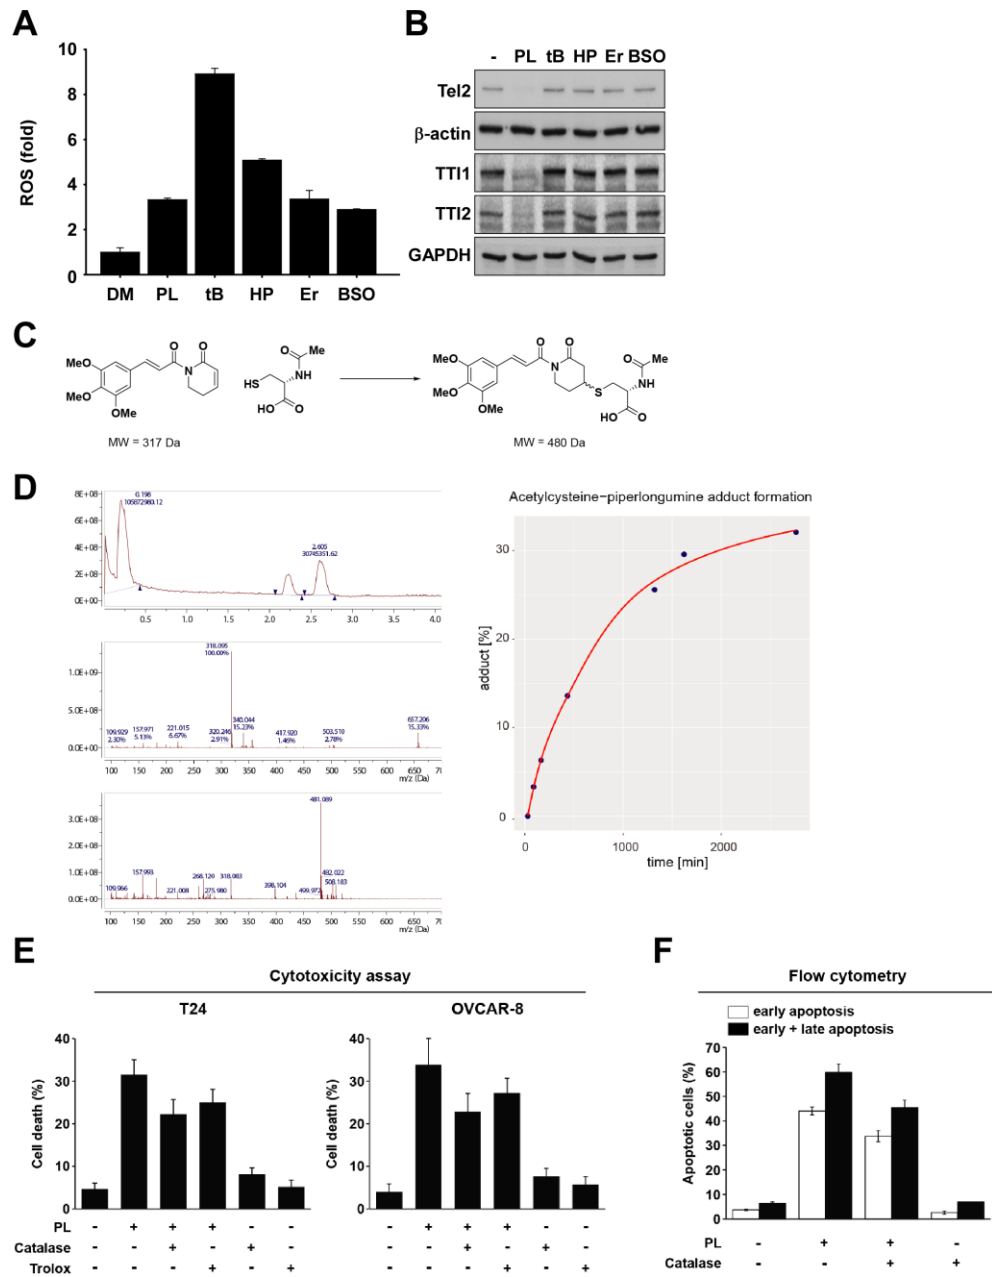

**Fig. S6. PL-mediated inhibition of the RUVBL1/2-TTT signaling is ROS-independent.** (A) ROS was measured 4 hours after various ROS inducers were treated to OVCAR-8 cells. tB, tert-butyl hydroperoxide; HP, hydrogen peroxide; Er, erastin; BSO, L-buthionine-sulfoximine. (B) Immunoblot was used to examine expression of Tel2, TTI1, and TTI2 after treating various ROS inducers for 6 hours. (C) N-acetylcysteine-PL adduct formation. (D) Peaks corresponding to PL at mass of 318.095 and to adduct at 481.089 were identified. The percent adduct formation was calculated. (E) Catalase (2000 U/ml) and Trolox (750  $\mu$ M) were pretreated for 1 hr before PL (10  $\mu$ M) was added. Cell death was measured 24 hr after PL treatment. (F) Catalase was pretreated for 1 hr before PL treatment in OVCAR-8 cells. Early apoptosis was measured using the Annexin V-only-positive population, and late apoptosis was measured using the Annexin V and propidium iodide-positive populations.

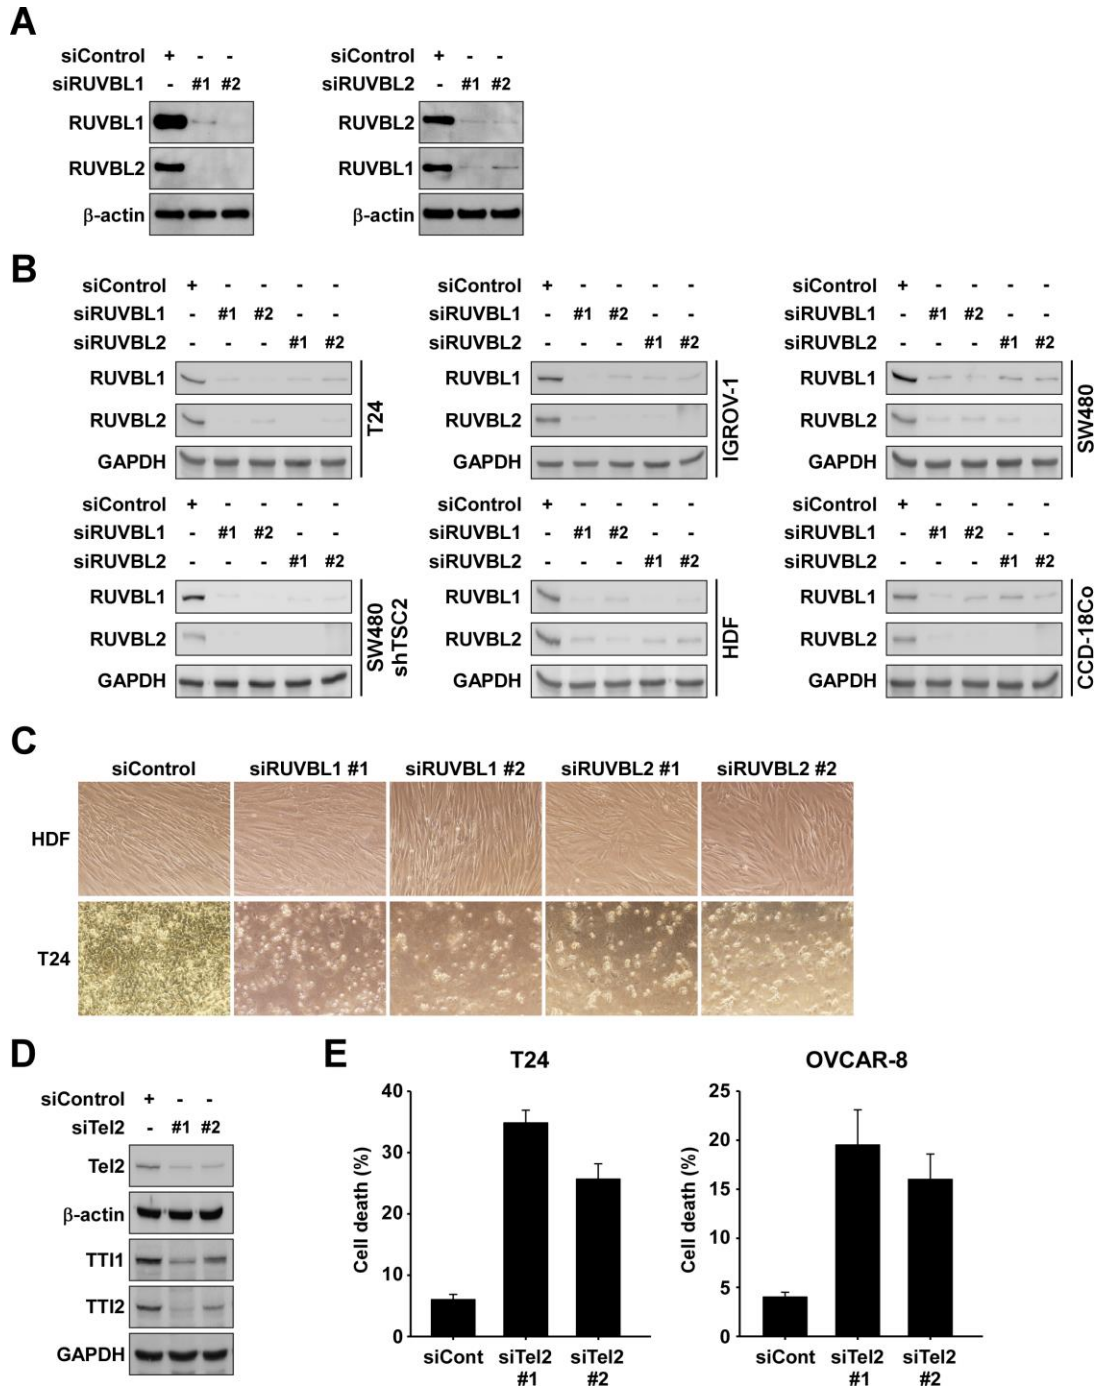

**Fig. S7. Effect of RUVBL1/2 and Tel2 knockdown.** (A-B) Knockdown of RUVBL1 and RUVBL2 was confirmed by immunoblot in OVCAR-8 cells (A), T24, IGROV-1, SW480, SW480-shTSC2, HDF and CCD-18Co cells (B). (C) Representative pictures of HDF (normal) and T24 (high-mTORC1 cancer) cells after RUVBL1/2 knockdown shows differential effect on viability. Pictures were taken 6 days (HDF) or 5 days (T24) after siRUVBL1/2 transfection. (D) Expression levels of TTT proteins after Tel2 knockdown were examined by immunoblot in T24 cells. (E) Cell death was measured 5 days after siTel2 transfection in T24 and OVCAR-8 cancer cells.

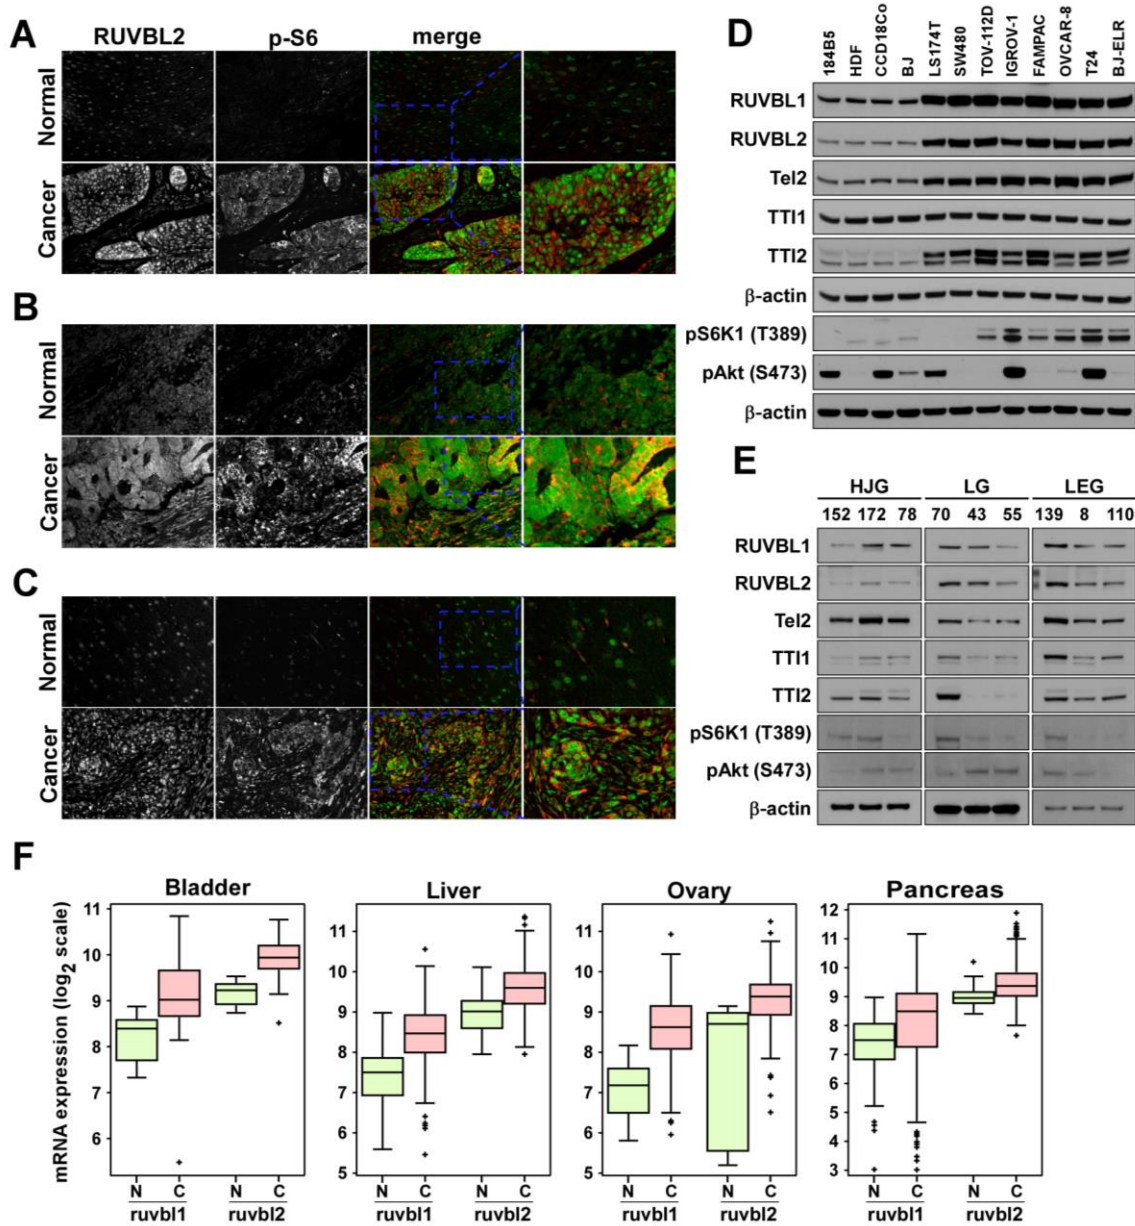

**Fig. S8. Expression of RUVBL1/2-TTT complex components.** Pictures of RUVBL2 (green) and phospho-S6 (red) staining from (A) esophagus cancer and its corresponding normal tissue, (B) lymph node cancer and its corresponding normal tissue, and (C) invasive squamous cell carcinoma of the skin and its corresponding normal tissue. Higher magnification of the merged picture is shown in the last panel. (D) Various cell lines were examined for RUVBL1/2, Tel2, TTI1, TTI2, p-p70S6K1, and p-Akt expression using the corresponding antibody. (E) Patient-derived primary tumors were analyzed for RUVBL1/2, Tel2, TTI1, TTI2, p-p70S6K1, and p-Akt expression using the corresponding antibody. (F) mRNA levels of *ruvbl1* and *ruvbl2* in human samples. Gene expression in 883 tumor and normal human tissue samples from three data sets (Gene Expression Omnibus, ArrayExpress, and Expression Project for Oncology) were analyzed using GENT. N, normal; C, cancer. All comparisons between normal and cancer:  $p < 0.002$ .

| No | Coordinate | Sex | Age | Key word                 |                                                             |
|----|------------|-----|-----|--------------------------|-------------------------------------------------------------|
| 1  | A          | 1,2 | f   | 55                       | Brain: glioblastoma                                         |
| 2  |            | 3   | f   | 55                       | Non neoplastic from A1,2                                    |
| 3  |            | 4,5 | m   | 28                       | Skin: invasive squamous cell carcinoma                      |
| 4  |            | 6   | m   | 28                       | Non neoplastic from A4,5                                    |
| 5  |            | 7,8 | m   | 69                       | Lymph node: tumor metastasis                                |
| 6  |            | 9   | m   | 69                       | Non neoplastic from A7,8                                    |
| 7  | B          | 1,2 | m   | 67                       | Esophagus: squamous cell carcinoma                          |
| 8  |            | 3   | m   | 67                       | Non neoplastic from B1,2                                    |
| 9  |            | 4,5 | m   | 70                       | Larynx: invasive squamous cell carcinoma                    |
| 10 |            | 6   | m   | 70                       | Non neoplastic from B4,5                                    |
| 11 |            | 7,8 | f   | 75                       | Lung: papillary adenocarcinoma                              |
| 12 | 9          | f   | 75  | Non neoplastic from B7,8 |                                                             |
| 13 | C          | 1,2 | m   | 49                       | Hypopharynx: invasive squamous cell carcinoma               |
| 14 |            | 3   | m   | 49                       | Non neoplastic form C1,2                                    |
| 15 |            | 4,5 | m   | 61                       | Tonsil: squamous cell carcinoma                             |
| 16 |            | 6   | m   | 61                       | Non neoplastic form C4,5                                    |
| 17 |            | 7,8 | f   | 43                       | Breast: infiltrating ductal carcinoma                       |
| 18 |            | 9   | f   | 43                       | Non neoplastic form C7,8                                    |
| 19 | D          | 1,2 | f   | 25                       | Thyroid gland: papillary carcinoma                          |
| 20 |            | 3   | f   | 25                       | Non neoplastic from D1,2                                    |
| 21 |            | 4,5 | m   | 42                       | Stomach: signet ring cell carcinoma                         |
| 22 |            | 6   | m   | 42                       | Non neoplastic from D4,5                                    |
| 23 |            | 7,8 | f   | 36                       | Cervix: invasive squamous cell carcinoma                    |
| 24 |            | 9   | f   | 36                       | Non neoplastic from D7,8                                    |
| 25 | E          | 1,2 | f   | 75                       | Gallbladder: papillary adenocarcinoma                       |
| 26 |            | 3   | f   | 75                       | Non neoplastic from E1,2                                    |
| 27 |            | 4,5 | m   | 62                       | Pancreas: adenocarcinoma                                    |
| 28 |            | 6   | m   | 62                       | Non neoplastic from E4,5                                    |
| 29 |            | 7,8 | f   | 40                       | Ovary: endometrioid adenocarcinoma                          |
| 30 |            | 9   | f   | 40                       | Non neoplastic from E7,8                                    |
| 31 | F          | 1,2 | m   | 52                       | Liver: hepatocellular carcinoma                             |
| 32 |            | 3   | m   | 52                       | Non neoplastic from F1,2                                    |
| 33 |            | 4,5 | f   | 75                       | Colon: adenocarcinoma                                       |
| 34 |            | 6   | f   | 75                       | Non neoplastic from F4,5                                    |
| 35 |            | 7,8 | m   | 65                       | Prostate: adenocarcinoma                                    |
| 36 |            | 9   | m   | 65                       | Non neoplastic from F7,8                                    |
| 37 | G          | 1,2 | f   | 58                       | Kidney renal cell carcinoma                                 |
| 38 |            | 3   | f   | 58                       | Non neoplastic from G1,2                                    |
| 39 |            | 4,5 | m   | 48                       | Urinary bladder: adenocarcinoma, signet ring cell carcinoma |
| 40 |            | 6   | m   | 48                       | Non neoplastic from G4,5                                    |
| 41 |            | 7,8 | m   | 19                       | Testis: germ cell tumor                                     |
| 42 |            | 9   | m   | 19                       | Non neoplastic from G7,8                                    |

**Fig. S9. Human tissue array information.**

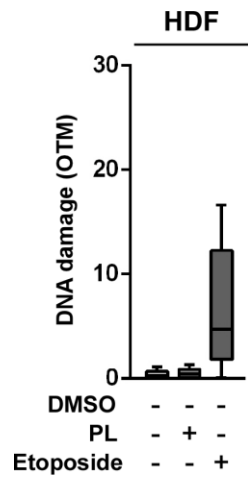

**Fig. S10. Effect of PL and etoposide on DNA damage in human dermal fibroblasts (HDF).** Cells were treated with PL (10  $\mu$ M) or etoposide (40  $\mu$ M) for 14 hours and collected for DNA damage measurement using comet assay. DNA damage was quantified based on the Olive Tail Movement (OTM) value, automatically calculated using a computer program, CometScore.

**Table S1. Screening results for selective cytotoxicity in SW480 shTSC2 (KD) and SW480 shControl (WT) cells.**

| <b>Compound</b>              | <b>KD-WT (RFU)</b> |
|------------------------------|--------------------|
| Piperlongumine               | 21.466             |
| ABT-199                      | 20.9765            |
| Ivermectin                   | 20.5855            |
| Sertaconazole (nitrate)      | 20.56              |
| Thiostrepton                 | 19.8095            |
| LDK378                       | 18.0655            |
| Selamectin                   | 16.8985            |
| Otilonium (bromide)          | 16.089             |
| Butoconazole (nitrate)       | 14.608             |
| Triclosan                    | 12.82              |
| Miconazole (nitrate)         | 12.446             |
| Sertraline (hydrochloride)   | 12.132             |
| Nelfinavir (Mesylate)        | 10.8445            |
| Ropinirole (hydrochloride)   | 10.73              |
| Azelnidipine                 | 10.599             |
| Penfluridol                  | 10.448             |
| Cobimetinib (hemifumarate)   | 10.0265            |
| Propyphenazone               | 9.5865             |
| Oxiconazole nitrate          | 8.4555             |
| Benidipine (hydrochloride)   | 8.3565             |
| Tamoxifen                    | 7.8985             |
| Efavirenz                    | 7.833              |
| SP600125                     | 7.774              |
| Sofalcone                    | 7.587              |
| Fenticonazole (Nitrate)      | 6.956              |
| Ticagrelor                   | 6.92               |
| Menadione bisulfite (sodium) | 6.836              |
| Clotrimazole                 | 6.6435             |
| Octenidine (dihydrochloride) | 6.593              |
| Ethacridine (lactate)        | 6.255              |
| Hexylresorcinol              | 6.2015             |
| Olanzapine                   | 6.18               |
| Belinostat                   | 6.01               |
| Regorafenib (monohydrate)    | 6.0075             |
| Lomitapide                   | 5.9035             |
| Clofazimine                  | 5.765              |
| Raloxifene (hydrochloride)   | 5.36               |
| Regorafenib (Hydrochloride)  | 5.128              |
| Regorafenib                  | 5.086              |
| Ciclopirox                   | 5.085              |
| Felodipine                   | 5.084              |

|                                  |        |
|----------------------------------|--------|
| Acriflavine                      | 5.082  |
| Mometasone furoate               | 4.82   |
| Phenoxybenzamine (hydrochloride) | 4.742  |
| Testosterone (propionate)        | 4.653  |
| Lacidipine                       | 4.342  |
| Isoconazole (nitrate)            | 4.3065 |
| BIBF 1120 (esylate)              | 4.2405 |
| Candesartan (Cilexetil)          | 4.0325 |
| MLN9708                          | 3.978  |
| Carfilzomib                      | 3.929  |
| AZD-9291                         | 3.906  |
| Polaprezinc                      | 3.869  |
| Duloxetine (hydrochloride)       | 3.8615 |
| Salmeterol (xinafoate)           | 3.7395 |
| Afatinib (dimaleate)             | 3.7115 |
| Vortioxetine (hydrobromide)      | 3.61   |
| Ponatinib                        | 3.596  |
| Fluvoxamine (maleate)            | 3.586  |
| Fluoxetine (hydrochloride)       | 3.5635 |
| Orlistat                         | 3.563  |
| Fingolimod                       | 3.538  |
| Chloranil                        | 3.46   |
| Disulfiram                       | 3.4135 |
| Rotigotine (Hydrochloride)       | 3.3315 |
| Trimebutine (maleate)            | 3.298  |
| Cabozantinib                     | 3.2865 |
| Vinblastine (sulfate)            | 3.2795 |
| Prazosin (hydrochloride)         | 3.1495 |
| Paroxetine (hydrochloride)       | 3.1055 |
| Palbociclib (isethionate)        | 3.0585 |
| Bortezomib                       | 2.927  |
| Reserpine                        | 2.9095 |
| Oxybutynin                       | 2.856  |
| Norethindrone acetate            | 2.821  |
| Trihexyphenidyl (hydrochloride)  | 2.8105 |
| Nebivolol (hydrochloride)        | 2.776  |
| Ibuprofen piconol                | 2.759  |
| Vorapaxar                        | 2.715  |
| mitomycin C                      | 2.68   |
| ABT-333                          | 2.663  |
| Hexachlorophene                  | 2.6375 |
| Panobinostat                     | 2.6075 |
| Artemether                       | 2.6035 |
| veteprofin                       | 2.5675 |
| Domiphen (bromide)               | 2.565  |

|                                        |        |
|----------------------------------------|--------|
| (E)-oxyresveratrol                     | 2.563  |
| Triflupromazine (hydrochloride)        | 2.5515 |
| Clomiphene (citrate)                   | 2.46   |
| Diphenyleneiodonium chloride           | 2.455  |
| Propafenone (hydrochloride)            | 2.4245 |
| Dovitinib (lactate)                    | 2.42   |
| Cetylpyridinium (chloride monohydrate) | 2.396  |
| Amsacrine                              | 2.373  |
| Ethacridine (lactate monohydrate)      | 2.361  |
| LX1606 (Hippurate)                     | 2.318  |
| Flunarizine (dihydrochloride)          | 2.316  |
| Memantine (hydrochloride)              | 2.3155 |
| Benzyl benzoate                        | 2.313  |
| Lopinavir                              | 2.3095 |
| Trametinib (DMSO solvate)              | 2.2935 |
| Artemisinin                            | 2.286  |
| Pamidronic acid                        | 2.2715 |
| Nicardipine (Hydrochloride)            | 2.2405 |
| Chlorquinaldol                         | 2.2325 |
| Sorafenib                              | 2.199  |
| Cabozantinib (S-malate)                | 2.192  |
| Trametinib                             | 2.19   |
| Loratadine                             | 2.188  |
| Valnemulin (Hydrochloride)             | 2.1755 |
| Nilvadipine                            | 2.165  |
| Cinacalcet (hydrochloride)             | 2.1565 |
| Doxycycline (hyclate)                  | 2.152  |
| Theophylline (1,3-Dimethylxanthine)    | 2.144  |
| Honokiol                               | 2.117  |
| Malotilate                             | 2.0995 |
| Chlorhexidine                          | 2.064  |
| Brexpiprazole                          | 2.044  |
| Retapamulin                            | 2.001  |
| Rolapitant                             | 1.982  |
| Cinnarizine                            | 1.9505 |
| Toremifene (Citrate)                   | 1.905  |
| Cilnidipine                            | 1.881  |
| Nafamostat (mesylate)                  | 1.8695 |
| Elvitegravir                           | 1.8415 |
| Dihydroergotoxine (mesylate)           | 1.8405 |
| Afatinib                               | 1.833  |
| Afatinib                               | 1.8195 |
| Amlodipine (maleate)                   | 1.817  |
| Antipyrine                             | 1.804  |
| Ethinodiol (diacetate)                 | 1.779  |



|                                                  |        |
|--------------------------------------------------|--------|
| Polidocanol                                      | 1.771  |
| Ciclesonide                                      | 1.742  |
| (E)-Oxyresveratrol tetra methyl ether [(E)-OTME] | 1.7215 |
| Meticrane                                        | 1.72   |
| Sertindole                                       | 1.704  |
| Topiramate                                       | 1.701  |
| Thiamine hydrochloride                           | 1.696  |
| Meropenem (trihydrate)                           | 1.6828 |
| Trifluoperazine (dihydrochloride)                | 1.68   |
| Beclometasone dipropionate                       | 1.6755 |
| Hydroxyprogesterone caproate                     | 1.671  |
| Vincristine (sulfate)                            | 1.67   |
| Cyproheptadine (hydrochloride sesquihydrate)     | 1.666  |
| Carvedilol                                       | 1.6585 |
| gomisin N                                        | 1.648  |
| schisandrin B                                    | 1.6455 |
| Mebendazole                                      | 1.6295 |
| Oxybutynin (chloride)                            | 1.6245 |
| Dipyridamole                                     | 1.608  |
| Lafutidine                                       | 1.602  |
| Cinacalcet                                       | 1.6    |
| Fenofibrate                                      | 1.589  |
| Diethylstilbestrol                               | 1.571  |
| Tamoxifen (Citrate)                              | 1.564  |
| Dolutegravir                                     | 1.563  |
| rotenone                                         | 1.5475 |
| Nitroprusside (disodium dihydrate)               | 1.542  |
| Flibanserin                                      | 1.537  |
| Butylated Hydroxytoluene                         | 1.471  |
| Conivaptan (hydrochloride)                       | 1.454  |
| 1,1-dimethylbiguanide hydrochloride              | 1.449  |
| Garenoxacin (Mesylate hydrate)                   | 1.422  |
| Rotigotine                                       | 1.42   |
| Acarbose                                         | 1.3993 |
| Progesterone                                     | 1.3985 |
| Elafibranor                                      | 1.398  |
| Isoproterenol                                    | 1.391  |
| Vinorelbine (ditartrate)                         | 1.3895 |
| Rupatadine (Fumarate)                            | 1.388  |
| Arbutin                                          | 1.384  |
| Tilorone (dihydrochloride)                       | 1.3695 |
| Cortisone (acetate)                              | 1.3552 |
| Amiodarone (hydrochloride)                       | 1.3525 |
| Triamcinolone (acetonide)                        | 1.328  |
| 9-Aminoacridine                                  | 1.3195 |

|                                               |        |
|-----------------------------------------------|--------|
| Betaxolol (hydrochloride)                     | 1.312  |
| Edoxaban (tosylate monohydrate)               | 1.3015 |
| Simeprevir                                    | 1.301  |
| 5,7-dihydroxy-4'-methoxyisoflavoneBiochanin A | 1.2945 |
| 3-Coumaric acid                               | 1.284  |
| Fludrocortisone (acetate)                     | 1.278  |
| Stiripentol                                   | 1.267  |
| Vinblastine                                   | 1.2615 |
| josamycin                                     | 1.2545 |
| Bephenium (hydroxynaphthoate)                 | 1.2386 |
| Surforaphane                                  | 1.2305 |
| Nisoldipine                                   | 1.224  |
| Shogaol                                       | 1.221  |
| Entrectinib                                   | 1.2195 |
| Cilazapril (monohydrate)                      | 1.213  |
| Surforaphene                                  | 1.2075 |
| Oxeladin (citrate)                            | 1.198  |
| Nilotinib                                     | 1.193  |
| Rivaroxaban                                   | 1.19   |
| Clevidipine                                   | 1.1825 |
| Tolvaptan                                     | 1.18   |
| Benzyl Isothiocyanate                         | 1.1755 |
| Gefitinib                                     | 1.173  |
| (+)-Naringenin,approx                         | 1.165  |
| Sulconazole (nitrate)                         | 1.1635 |
| AICAR                                         | 1.16   |
| Pentamidine (isethionate)                     | 1.159  |
| Gemfibrozil                                   | 1.15   |
| Amorolfine (hydrochloride)                    | 1.148  |
| Dimethyl fumarate                             | 1.1455 |
| Nitrendipine                                  | 1.145  |
| Surforaphane-cys                              | 1.1445 |
| Toceranib (phosphate)                         | 1.1425 |
| Magnolol                                      | 1.141  |
| Oritavancin (diphosphate)                     | 1.1395 |
| Saquinavir                                    | 1.135  |
| Iberin                                        | 1.1315 |
| Etofenamate                                   | 1.1305 |
| Sulfacarbamide                                | 1.1265 |
| Artesunate                                    | 1.126  |
| Butamben                                      | 1.121  |
| Retinoic acid                                 | 1.116  |
| Temocapril (hydrochloride)                    | 1.092  |
| Mifepristone                                  | 1.0785 |
| Gliquidone                                    | 1.0755 |

|                                         |        |
|-----------------------------------------|--------|
| 6,7,4'-Trihydroxyisoflavone             | 1.0685 |
| Tazarotene                              | 1.068  |
| Idebenone                               | 1.051  |
| Cefdinir                                | 1.0415 |
| Cyclosporin A                           | 1.04   |
| Anisyl acetone                          | 1.0395 |
| Hydroxyzine (dihydrochloride)           | 1.034  |
| Flavoxate (hydrochloride)               | 1.0315 |
| Gingerenone A                           | 1.027  |
| Losartan                                | 1.0031 |
| Pheniramine (Maleate)                   | 1      |
| Quinapril (hydrochloride)               | 0.998  |
| Digoxin                                 | 0.983  |
| dihydrocapsaicin                        | 0.9755 |
| Isotretinoin                            | 0.9745 |
| Cefamandole (nafate)                    | 0.973  |
| Solifenacin (Succinate)                 | 0.9715 |
| Phenethyl isothiocyanate                | 0.9695 |
| Manidipine (dihydrochloride)            | 0.967  |
| Terconazole                             | 0.96   |
| 6-NBDG                                  | 0.954  |
| Tebipenem pivoxil                       | 0.951  |
| Ouabain (Octahydrate)                   | 0.951  |
| Evodiamine                              | 0.949  |
| Amezinium (methylsulfate)               | 0.931  |
| Isogarcinal                             | 0.93   |
| 4-Hydroxy-3-methoxycinnamaldehyde       | 0.9265 |
| butein                                  | 0.917  |
| 5-Azacytidine                           | 0.917  |
| Apocynin                                | 0.915  |
| Riboflavin Tetrabutryate                | 0.9055 |
| trans-Cinnamic acid                     | 0.904  |
| Curcumin                                | 0.8985 |
| Biperiden (Hydrochloride)               | 0.8985 |
| Glycyrrhizin, Ammonium salt             | 0.8925 |
| Dabigatran etexilate                    | 0.8875 |
| caffeine                                | 0.884  |
| Rimantadine (hydrochloride)             | 0.88   |
| Zoledronic acid (monohydrate)           | 0.873  |
| Brinzolamide                            | 0.87   |
| dimethoxy-4-hydroxycinnamaldehyde (D4H) | 0.8695 |
| Gingerol                                | 0.8685 |
| Luteolin                                | 0.8625 |
| Anidulafungin                           | 0.86   |
| Demeclocycline (hydrochloride)          | 0.8595 |

|                                           |        |
|-------------------------------------------|--------|
| Nifuratel                                 | 0.8575 |
| Deracoxib                                 | 0.85   |
| Juglon                                    | 0.848  |
| Nilotinib (monohydrochloride monohydrate) | 0.846  |
| 2-Hydroxycinnamic acid                    | 0.834  |
| AS(Arsenic)                               | 0.834  |
| Palbociclib (hydrochloride)               | 0.834  |
| Itraconazole                              | 0.8315 |
| Meglumine                                 | 0.8315 |
| Posaconazole                              | 0.827  |
| Estriol                                   | 0.827  |
| Irsogladine                               | 0.818  |
| Racecadotril                              | 0.816  |
| Cabazitaxel                               | 0.8135 |
| Azathioprine                              | 0.812  |
| Acetylleucine                             | 0.806  |
| Sorafenib (Tosylate)                      | 0.799  |
| Glutathione                               | 0.799  |
| Gefitinib                                 | 0.7935 |
| Bexarotene                                | 0.7925 |
| Hesperidin                                | 0.792  |
| Trolox                                    | 0.79   |
| citric acid                               | 0.788  |
| Gentisic acid                             | 0.7865 |
| tet-hydrocurumin                          | 0.7865 |
| Perphenazine                              | 0.784  |
| sinigrin                                  | 0.783  |
| Canagliflozin                             | 0.783  |
| Cyanidin                                  | 0.7805 |
| Levonorgestrel                            | 0.776  |
| CATECHIN                                  | 0.7755 |
| Diiodohydroxyquinoline                    | 0.7755 |
| Glycyrrhizin                              | 0.763  |
| Ledipasvir                                | 0.7595 |
| Indol-3-carbinnol                         | 0.7555 |
| Clobetasol propionate                     | 0.753  |
| Daidzin                                   | 0.752  |
| capsiate                                  | 0.748  |
| Ginsenoside Rh1                           | 0.746  |
| Tauroursodeoxycholate (Sodium)            | 0.743  |
| cyclo-pamine                              | 0.7405 |
| Docusate (Sodium)                         | 0.719  |
| Benzbromarone                             | 0.718  |
| Fosaprepitant (dimeglumine)               | 0.718  |
| 7,8,4'- trihydroxyisoflavone              | 0.716  |

|                                                      |        |
|------------------------------------------------------|--------|
| Podophyllotoxin                                      | 0.7085 |
| Compound K                                           | 0.7075 |
| Compound C                                           | 0.707  |
| Actinomycin D                                        | 0.704  |
| Glycyrrhetic Acid                                    | 0.699  |
| Moxifloxacin (Hydrochloride)                         | 0.6945 |
| Dexamethasone (acetate)                              | 0.6915 |
| 1,2-bis-3,4,5-trimethoxy phenyl ethene (bis-TPE)     | 0.6835 |
| DATS                                                 | 0.6825 |
| Quinidine                                            | 0.682  |
| Iloperidone                                          | 0.6785 |
| trihydroxyisoflavone (7,3',4'-THI)                   | 0.675  |
| Galcinol                                             | 0.6745 |
| Camostat (mesylate)                                  | 0.6715 |
| Lenvatinib                                           | 0.6695 |
| Carbenicillin (disodium)                             | 0.667  |
| 4-Hydroxy-3-methoxybenzoic acid (Vanillic acid)      | 0.6665 |
| Brigatinib                                           | 0.665  |
| Fludarabine (phosphate)                              | 0.663  |
| Taurine                                              | 0.662  |
| Chlorprothixene                                      | 0.6615 |
| Nimodipine                                           | 0.6605 |
| Prulifloxacin                                        | 0.6605 |
| Hydrocortison                                        | 0.66   |
| Fosphenytoin (disodium)                              | 0.658  |
| Fluticasone (propionate)                             | 0.655  |
| 3,4-Dihydroxyhydrocinnamic acid (Hydroxcaffeic acid) | 0.654  |
| Glutamate                                            | 0.653  |
| Cinobufotalin                                        | 0.6475 |
| Atovaquone                                           | 0.643  |
| Gatifloxacin                                         | 0.642  |
| Pomalidomide                                         | 0.6375 |
| Nodakenin                                            | 0.6365 |
| Tiratricol                                           | 0.636  |
| Solifenacin                                          | 0.631  |
| Ethyl homovanillate                                  | 0.6305 |
| Selumetinib                                          | 0.627  |
| Gemcitabine                                          | 0.6265 |
| Carmustine                                           | 0.6225 |
| Loteprednol Etabonate                                | 0.619  |
| Proguanil                                            | 0.6125 |
| Tolcapone                                            | 0.6085 |
| Ulipristal (acetate)                                 | 0.6085 |
| Pirarubicin                                          | 0.6    |
| Avobenzone                                           | 0.5975 |

|                                    |        |
|------------------------------------|--------|
| Ruthenium red                      | 0.597  |
| Orotic acid                        | 0.595  |
| Pantoprazole (sodium)              | 0.5895 |
| Teniposide                         | 0.5885 |
| Ginsenoside Rh2                    | 0.5885 |
| Gestodene                          | 0.5885 |
| IOCM1                              | 0.587  |
| Protriptyline (hydrochloride)      | 0.585  |
| 6-Mercaptopurine                   | 0.584  |
| Na3NO4 YA                          | 0.582  |
| Trimetazidin                       | 0.574  |
| Amphotericin B                     | 0.5735 |
| Albendazole                        | 0.569  |
| Bethanechol (chloride)             | 0.5635 |
| Ginsenoside f2                     | 0.5625 |
| Cisplatin                          | 0.5595 |
| peonidin                           | 0.5585 |
| tert-Butylhydroquinone             | 0.557  |
| Ledipasvir (D-tartrate)            | 0.5545 |
| Tyrosol                            | 0.554  |
| Rifapentine                        | 0.5525 |
| Lapatinib                          | 0.5495 |
| sesamol, minimum 99% TLC           | 0.5475 |
| Glibenclamide                      | 0.536  |
| spermidine S2626-1G                | 0.532  |
| carosol                            | 0.5315 |
| Decloxizine (dihydrochloride)      | 0.531  |
| Rotundine                          | 0.5305 |
| Desvenlafaxine (succinate hydrate) | 0.5255 |
| Tolperisone (hydrochloride)        | 0.5253 |
| Sinapin aldehyde                   | 0.525  |
| Jaceosidin                         | 0.5235 |
| Levofloxacin                       | 0.5235 |
| Nifedipine                         | 0.5225 |
| Diindolylmethane                   | 0.5215 |
| Decursinol angelate                | 0.521  |
| t,t-Farnesol                       | 0.5205 |
| Cidofovir                          | 0.519  |
| Lasofloxifene (Tartrate)           | 0.5185 |
| Besifloxacin (Hydrochloride)       | 0.517  |
| Colchicine                         | 0.516  |
| gomisin A                          | 0.5135 |
| Norethindrone                      | 0.513  |
| Hydroxyfasudil                     | 0.509  |
| Rosmarinic acid                    | 0.506  |

|                                         |        |
|-----------------------------------------|--------|
| Amiloride (hydrochloride)               | 0.503  |
| Ziprasidone (hydrochloride monohydrate) | 0.501  |
| Pazopanib                               | 0.498  |
| Nitrofurazone                           | 0.492  |
| Mitiglinide (Calcium)                   | 0.492  |
| Hirsutenone                             | 0.488  |
| Tropisetron (Hydrochloride)             | 0.4845 |
| Loperamide (hydrochloride)              | 0.4835 |
| Indomethacin                            | 0.481  |
| Tegafur                                 | 0.4805 |
| Pranlukast                              | 0.4805 |
| Paclitaxel                              | 0.48   |
| Caffeic acid phenethyl ester            | 0.479  |
| Rifabutin                               | 0.4705 |
| Gadodiamide                             | 0.4695 |
| Irbesartan                              | 0.4675 |
| Tedizolid                               | 0.4675 |
| Metoclopramide (hydrochloride hydrate)  | 0.4675 |
| Myricetin                               | 0.466  |
| Canagliflozin (hemihydrate)             | 0.463  |
| Dinoprost (tromethamine salt)           | 0.4625 |
| Cabergoline                             | 0.4615 |
| capsazepine                             | 0.4595 |
| Prucalopride                            | 0.453  |
| Estradiol (benzoate)                    | 0.452  |
| Procaine (hydrochloride)                | 0.451  |
| Enterolacton                            | 0.4505 |
| D-Mannitol                              | 0.4485 |
| Ronidazole                              | 0.4455 |
| SYRINGIC ACID                           | 0.444  |
| 4-Chloro-3-methylphenol                 | 0.4425 |
| Topotecan (Hydrochloride)               | 0.4405 |
| Acacetin                                | 0.439  |
| Darifenacin (hydrobromide)              | 0.4375 |
| Halcinonide                             | 0.437  |
| Levosulpiride                           | 0.4365 |
| Estrone                                 | 0.4345 |
| 5-Fluorouracil                          | 0.433  |
| Tranlycypromine (hemisulfate)           | 0.432  |
| Docetaxel                               | 0.4315 |
| Oxymetazoline (hydrochloride)           | 0.4315 |
| Diatrizoic acid                         | 0.431  |
| 2-Ethoxybenzamide                       | 0.43   |
| Riluzole                                | 0.4295 |
| Enzalutamide                            | 0.4285 |

|                                       |        |
|---------------------------------------|--------|
| Mafenide (Acetate)                    | 0.421  |
| propionic acid                        | 0.4185 |
| Sparfloxacin                          | 0.4175 |
| Genistein                             | 0.413  |
| Ondansetron (hydrochloride dihydrate) | 0.411  |
| Tiamulin (fumarate)                   | 0.4085 |
| Fadrozole                             | 0.407  |
| Pilocarpine (Hydrochloride)           | 0.407  |
| Carbinoxamine maleate salt            | 0.4064 |
| Colistin (sulfate)                    | 0.4045 |
| Piperazine                            | 0.4035 |
| Methazolamide                         | 0.4035 |
| caffeic acid                          | 0.4035 |
| Bromhexine (hydrochloride)            | 0.403  |
| Thiamine monochloride                 | 0.403  |
| schisandrin C                         | 0.4015 |
| Methicillin (sodium salt)             | 0.4015 |
| Silibinin                             | 0.3995 |
| Cloperastine fendizoate               | 0.399  |
| Erucin                                | 0.3985 |
| Adefovir dipivoxil                    | 0.398  |
| pelargonidin                          | 0.397  |
| Eptifibatide                          | 0.3965 |
| Iopamidol                             | 0.396  |
| Prasugrel                             | 0.3905 |
| Nitrofurantoin                        | 0.39   |
| Adenosine                             | 0.3895 |
| (R)-Lansoprazole                      | 0.3875 |
| Cyclophosphamide                      | 0.3865 |
| Seratrovast                           | 0.386  |
| Fulvestrant                           | 0.3825 |
| Gossypin                              | 0.382  |
| Bufexamac                             | 0.381  |
| Tetracaine (hydrochloride)            | 0.38   |
| Vincamine                             | 0.3775 |
| Abiraterone (acetate)                 | 0.377  |
| Mycophenolate mofetil                 | 0.377  |
| 6-Gingerol                            | 0.376  |
| Vitamin K1                            | 0.3755 |
| SINAPIC ACID, 98% titration           | 0.3755 |
| Trimethylether                        | 0.3745 |
| isorhamnetin                          | 0.374  |
| Ruxolitinib (phosphate)               | 0.3715 |
| Desonide                              | 0.37   |
| Diltiazem (hydrochloride)             | 0.3635 |



|                                 |        |
|---------------------------------|--------|
| Danazol                         | 0.3625 |
| Hydrocortisone                  | 0.3615 |
| Asenapine (hydrochloride)       | 0.3615 |
| Valbenazine                     | 0.3605 |
| Ritonavir                       | 0.359  |
| Estradiol                       | 0.359  |
| Droperidol                      | 0.355  |
| Chlormadinone (acetate)         | 0.354  |
| Pimavanserin tartrate           | 0.3535 |
| Glipizide                       | 0.353  |
| Pranlukast (hemihydrate)        | 0.3525 |
| Demethylsuberosin               | 0.35   |
| Levetiracetam                   | 0.3495 |
| Vitamin C                       | 0.3485 |
| Adrenalone (hydrochloride)      | 0.348  |
| Argatroban (monohydrate)        | 0.3475 |
| Gabexate (mesylate)             | 0.3475 |
| Stibogluconate (sodium)         | 0.347  |
| Leuprolide Acetate              | 0.3465 |
| Methylbenactyzium Bromide       | 0.346  |
| Valpromide                      | 0.345  |
| Dabigatran etexilate (mesylate) | 0.3445 |
| Benzocaine                      | 0.3435 |
| Cefotiam (hydrochloride)        | 0.3435 |
| Antazoline (hydrochloride)      | 0.3415 |
| Apatinib                        | 0.3415 |
| 5-Deoxykaemferol                | 0.341  |
| Ritodrine (hydrochloride)       | 0.341  |
| Olmесartan (medoxomil)          | 0.339  |
| Clomipramine (hydrochloride)    | 0.3385 |
| Adrafinil                       | 0.337  |
| Metoclopramide                  | 0.3365 |
| Pazufloxacin (mesylate)         | 0.335  |
| Biochanin A                     | 0.3335 |
| Haloperidol                     | 0.3305 |
| Erythromycin                    | 0.33   |
| Ramatroban                      | 0.33   |
| Ajmaline                        | 0.33   |
| Nitazoxanide                    | 0.329  |
| Artemotil                       | 0.327  |
| Latanoprost                     | 0.327  |
| capsaicin                       | 0.326  |
| Fusidic acid (sodium salt)      | 0.3255 |
| Vitamin B12                     | 0.325  |
| Isradipine                      | 0.325  |

|                                     |        |
|-------------------------------------|--------|
| Primaquine (Diphosphate)            | 0.3245 |
| Sodium Picosulfate                  | 0.3235 |
| GS-7340 (fumarate)                  | 0.3235 |
| Fosfluconazole                      | 0.3225 |
| Orphenadrine (citrate)              | 0.3225 |
| Ciprofibrate                        | 0.3225 |
| Hydroquinone                        | 0.3215 |
| Prostaglandin E2                    | 0.3215 |
| TAK-438 (free base)                 | 0.321  |
| Sulfacetamide (Sodium)              | 0.3195 |
| Domperidone                         | 0.317  |
| Pyriethoxin (dihydrochloride)       | 0.316  |
| Octocrylene                         | 0.316  |
| Fotemustine                         | 0.3155 |
| Chlortetracycline (hydrochloride)   | 0.315  |
| Alprenolol (hydrochloride)          | 0.3145 |
| Oxcarbazepine                       | 0.3115 |
| Trelagliptin (succinate)            | 0.311  |
| Fluphenazine (dihydrochloride)      | 0.31   |
| Rosiglitazone (maleate)             | 0.3075 |
| Dihydroergotamine (mesylate)        | 0.307  |
| Cobicistat                          | 0.3065 |
| Mepenzolate (Bromide)               | 0.3065 |
| Clofarabine                         | 0.3065 |
| Piribedil                           | 0.305  |
| Daunorubicin (Hydrochloride)        | 0.304  |
| Ethambutol (dihydrochloride)        | 0.304  |
| Tetracycline                        | 0.3035 |
| Kasugamycin (hydrochloride hydrate) | 0.3035 |
| Cyproheptadine (hydrochloride)      | 0.3025 |
| Spiramycin                          | 0.302  |
| Valdecoxib                          | 0.302  |
| Cetirizine (dihydrochloride)        | 0.302  |
| Lamivudine                          | 0.3015 |
| Isoliquiritigenin YA (ILT YA)       | 0.299  |
| Lercanidipine (hydrochloride)       | 0.2985 |
| Almotriptan (malate)                | 0.297  |
| Oxaliplatin                         | 0.296  |
| Desmopressin (Acetate)              | 0.294  |
| Daclatasvir (dihydrochloride)       | 0.2925 |
| Fertirelin                          | 0.292  |
| Pitolisant (hydrochloride)          | 0.292  |
| PSI-7977                            | 0.2905 |
| Enterodiol                          | 0.29   |
| Roxithromycin                       | 0.2895 |

|                                       |        |
|---------------------------------------|--------|
| D-Pantothenic acid (sodium)           | 0.2885 |
| Ivabradine (hydrochloride)            | 0.2855 |
| Pralidoxime (chloride)                | 0.2855 |
| Oxethazaine                           | 0.2835 |
| Zileuton                              | 0.2835 |
| Sulbactam                             | 0.2835 |
| Acetohydroxamic acid                  | 0.283  |
| Atorvastatin (hemicalcium salt)       | 0.2815 |
| 3-Hydroxycinnamic acid                | 0.281  |
| Cephalothin (sodium)                  | 0.281  |
| Glucosamine (hydrochloride)           | 0.2805 |
| Amifampridine                         | 0.2805 |
| Fenoprofen (Calcium hydrate)          | 0.2805 |
| zingerone                             | 0.2785 |
| Sulfadiazine                          | 0.2785 |
| CAL-101                               | 0.277  |
| Avibactam (sodium)                    | 0.2755 |
| Moexipril (hydrochloride)             | 0.275  |
| Donepezil (Hydrochloride)             | 0.2745 |
| Rifampicin                            | 0.274  |
| Losartan (potassium)                  | 0.2725 |
| 3,4-DHPAA (3,3-DDM)                   | 0.2705 |
| Rucaparib (phosphate)                 | 0.2705 |
| Iohexol                               | 0.269  |
| Ethionamide                           | 0.269  |
| Vancomycin (hydrochloride)            | 0.268  |
| Mefenamic acid                        | 0.2675 |
| Diquafosol (tetrasodium)              | 0.267  |
| Ospemifene                            | 0.265  |
| Nefopam (hydrochloride)               | 0.2635 |
| Zafirlukast                           | 0.262  |
| Gossypetin                            | 0.262  |
| Apigenin                              | 0.26   |
| Coumaric acid                         | 0.259  |
| Melatonin                             | 0.2585 |
| Tetrahydrobiopterin                   | 0.2575 |
| Pemirolast (potassium)                | 0.2565 |
| Capsanthin                            | 0.256  |
| Irinotecan (hydrochloride trihydrate) | 0.255  |
| emodin                                | 0.254  |
| Tamibarotene                          | 0.254  |
| Sulfanilamide                         | 0.254  |
| Ornidazole (Levo-)                    | 0.252  |
| Mitotane                              | 0.252  |
| Bromisoval                            | 0.2515 |

|                                               |        |
|-----------------------------------------------|--------|
| Hydroquinidine                                | 0.25   |
| Nepafenac                                     | 0.2495 |
| Bekanamycin                                   | 0.249  |
| Dextromethorphan (hydrobromide hydrate)       | 0.2485 |
| Salbutamol (hemisulfate)                      | 0.247  |
| BCH48                                         | 0.2465 |
| Cefazolin (sodium)                            | 0.246  |
| Mesna                                         | 0.246  |
| guanidine hydrochloride                       | 0.245  |
| Estramustine (phosphate sodium)               | 0.243  |
| Vilazodone (Hydrochloride)                    | 0.2415 |
| Daclatasvir                                   | 0.2415 |
| Benzydamine (hydrochloride)                   | 0.2415 |
| Pipobroman                                    | 0.2415 |
| Sildenafil (citrate)                          | 0.2415 |
| Ranolazine (dihydrochloride)                  | 0.239  |
| Metformin                                     | 0.2385 |
| Gamithromycin                                 | 0.2385 |
| Acrivastine                                   | 0.2375 |
| Cilastatin                                    | 0.2375 |
| Ivacaftor                                     | 0.236  |
| Levomefolate (calcium)                        | 0.2355 |
| Bucladesine (calcium salt)                    | 0.2355 |
| Buspirone (hydrochloride)                     | 0.2355 |
| Ezetimibe                                     | 0.235  |
| Dexamethasone                                 | 0.2345 |
| Tinidazole                                    | 0.2335 |
| Penicillamine                                 | 0.2325 |
| p-Aminosalicylic acid (sodium salt dihydrate) | 0.2315 |
| Altretamine                                   | 0.2285 |
| Felbinac                                      | 0.2285 |
| Trimetazidine (dihydrochloride)               | 0.228  |
| Efonidipine (hydrochloride monoethanolate)    | 0.2275 |
| Tolmetin (sodium dihydrate)                   | 0.2275 |
| Saquinavir (Mesylate)                         | 0.2265 |
| Cefotaxime (sodium salt)                      | 0.2265 |
| Amlodipine (besylate)                         | 0.226  |
| Pixantrone (dimaleate)                        | 0.2255 |
| 7,3',4'-trihydroxyisoflavone                  | 0.2245 |
| Vandetanib                                    | 0.223  |
| Oxiracetam                                    | 0.2225 |
| Etidronic acid                                | 0.222  |
| Licochalcone A                                | 0.2215 |
| Tangeretin                                    | 0.221  |
| Ifosfamide                                    | 0.221  |

|                                              |        |
|----------------------------------------------|--------|
| Telaprevir                                   | 0.22   |
| Buserelin (Acetate)                          | 0.2195 |
| Sodium Salicylate                            | 0.219  |
| Roflumilast                                  | 0.219  |
| Acetylcysteine                               | 0.2185 |
| Aliskiren (hemifumarate)                     | 0.2185 |
| Pivmecillinam (hydrochloride)                | 0.217  |
| Quetiapine (fumarate)                        | 0.2165 |
| Micafungin (sodium)                          | 0.2155 |
| NS-304                                       | 0.215  |
| Regadenoson                                  | 0.2145 |
| Dyclonine (hydrochloride)                    | 0.2145 |
| Prilocaine                                   | 0.214  |
| Megestrol (Acetate)                          | 0.214  |
| Nitisinone                                   | 0.2135 |
| Rebamipide                                   | 0.212  |
| Ciprofloxacin hydrochloride                  | 0.2115 |
| Ursodiol                                     | 0.21   |
| Daptomycin                                   | 0.21   |
| Spectinomycin (dihydrochloride pentahydrate) | 0.2075 |
| Amidopyrine                                  | 0.2075 |
| Nevirapine                                   | 0.2065 |
| Dronedarone                                  | 0.206  |
| Lapatinib (ditosylate)                       | 0.2055 |
| Isosorbide                                   | 0.205  |
| Clemizole (hydrochloride)                    | 0.205  |
| Cinepazide (Maleate)                         | 0.2035 |
| Prothionamide                                | 0.2035 |
| Perindopril (erbumine)                       | 0.2035 |
| Allopurinol                                  | 0.2    |
| Asenapine (maleate)                          | 0.199  |
| Nimorazole                                   | 0.199  |
| Aliskiren                                    | 0.1975 |
| Epinastine                                   | 0.1975 |
| Tolazoline (hydrochloride)                   | 0.197  |
| Naratriptan (hydrochloride)                  | 0.1965 |
| IOC1                                         | 0.1955 |
| Mebeverine (hydrochloride)                   | 0.195  |
| Benztropine (mesylate)                       | 0.195  |
| Riboflavin (phosphate sodium)                | 0.194  |
| Omeprazole                                   | 0.193  |
| Crotamiton                                   | 0.1925 |
| Piroxicam                                    | 0.1925 |
| Nalidixic acid                               | 0.192  |
| Proparacaine (Hydrochloride)                 | 0.191  |

|                                                                                     |        |
|-------------------------------------------------------------------------------------|--------|
| Reveratrol trimethyl ether (Resveratrol-tri)                                        | 0.1905 |
| Pemetrexed (disodium hemipenta hydrate)                                             | 0.1905 |
| Chloramphenicol                                                                     | 0.19   |
| Eltrombopag (Olamine)                                                               | 0.1895 |
| 10-Undecenoic acid                                                                  | 0.1895 |
| Vemurafenib                                                                         | 0.189  |
| Cloxacillin (sodium monohydrate)                                                    | 0.1885 |
| Xylometazoline (hydrochloride)                                                      | 0.188  |
| Cefonicid (sodium)                                                                  | 0.1875 |
| 3,3',5-Triiodo-L-thyronine                                                          | 0.1865 |
| Diphylline                                                                          | 0.1865 |
| Vecuronium (bromide)                                                                | 0.1855 |
| Gliclazide                                                                          | 0.185  |
| Piracetam                                                                           | 0.184  |
| Levamisole (hydrochloride)                                                          | 0.183  |
| Methacycline (hydrochloride)                                                        | 0.182  |
| Equol                                                                               | 0.181  |
| Methacholine (chloride)                                                             | 0.181  |
| Dapagliflozin                                                                       | 0.1805 |
| Ibuprofen                                                                           | 0.18   |
| Deoxycholic acid (3 $\alpha$ ,12 $\alpha$ -Dihydroxy-5 $\beta$ -cholan-24-oic acid) | 0.1795 |
| Imatinib (Mesylate)                                                                 | 0.1785 |
| Pirenzepine (dihydrochloride)                                                       | 0.1775 |
| Theobromine                                                                         | 0.177  |
| Ketanserin                                                                          | 0.1745 |
| Triamcinolone                                                                       | 0.1745 |
| Sulfisoxazole                                                                       | 0.1735 |
| Finasteride                                                                         | 0.172  |
| Adenosine                                                                           | 0.169  |
| Cisatracurium (besylate)                                                            | 0.169  |
| Repaglinide                                                                         | 0.169  |
| Methoxyphenamine (Hydrochloride)                                                    | 0.168  |
| Nafcillin (sodium monohydrate)                                                      | 0.168  |
| Doxylamine (succinate)                                                              | 0.168  |
| Procainamide (hydrochloride)                                                        | 0.1665 |
| Clebopride (malate)                                                                 | 0.1665 |
| Acidinium (Bromide)                                                                 | 0.1655 |
| Ethosuximide                                                                        | 0.165  |
| TAK-438                                                                             | 0.163  |
| Pazopanib (Hydrochloride)                                                           | 0.1625 |
| Praziquantel                                                                        | 0.162  |
| Dropropizine                                                                        | 0.162  |
| Gastrodin                                                                           | 0.1615 |
| Solifenacin (hydrochloride)                                                         | 0.161  |
| Carbamazepine                                                                       | 0.161  |

|                                |        |
|--------------------------------|--------|
| Amineptine                     | 0.161  |
| Estradiol (cypionate)          | 0.1605 |
| Sarpogrelate (hydrochloride)   | 0.1595 |
| Guaifenesin                    | 0.159  |
| Cyproterone (acetate)          | 0.159  |
| Pimecrolimus                   | 0.159  |
| Penicillin G (potassium)       | 0.1575 |
| Kanamycin (sulfate)            | 0.157  |
| Enalapril (maleate)            | 0.1565 |
| Scopolamine (butylbromide)     | 0.155  |
| Gemcitabine                    | 0.1545 |
| Promazine (hydrochloride)      | 0.1545 |
| Atazanavir (sulfate)           | 0.154  |
| Dimenhydrinate                 | 0.153  |
| Cefradine                      | 0.152  |
| Methylene Blue                 | 0.1505 |
| Choline Fenofibrate            | 0.1495 |
| Clemastine (fumarate)          | 0.149  |
| Rilpivirine                    | 0.149  |
| Salicylamide                   | 0.148  |
| Doxepin (Hydrochloride)        | 0.148  |
| CH5424802                      | 0.1475 |
| L-DOPA                         | 0.147  |
| Torsemide                      | 0.1465 |
| Lorcaserin (Hydrochloride)     | 0.146  |
| Chlorogenic acid               | 0.1455 |
| Simetryn                       | 0.1455 |
| Bivalirudin (Trifluoroacetate) | 0.145  |
| oleuropein                     | 0.145  |
| Teicoplanin                    | 0.144  |
| Piperazine (hexahydrate)       | 0.1435 |
| Clofibric acid                 | 0.1435 |
| Lithocholic acid               | 0.142  |
| L-Ascorbic acid                | 0.142  |
| Rifaximin                      | 0.142  |
| Lactulose                      | 0.1415 |
| Istradefylline                 | 0.141  |
| piperoxan                      | 0.1405 |
| Moxonidine                     | 0.1405 |
| Procarbazine (Hydrochloride)   | 0.1405 |
| Probucol                       | 0.1395 |
| Metoprolol (Succinate)         | 0.1395 |
| MALH115                        | 0.139  |
| Zidovudine                     | 0.138  |
| Tiopronin                      | 0.1375 |

|                                            |        |
|--------------------------------------------|--------|
| (±)-Bisoprolol (hemifumarate)              | 0.1375 |
| Valproic acid                              | 0.1375 |
| Carmofur                                   | 0.1375 |
| Hespecetin                                 | 0.137  |
| Ceftazidime                                | 0.137  |
| Tiotropium (Bromide)                       | 0.1355 |
| 3,4,5-trihydroxybenzoic acid (GALLIC ACID) | 0.1345 |
| Baricitinib (phosphate)                    | 0.1345 |
| BCH883                                     | 0.1335 |
| Penciclovir                                | 0.133  |
| Permethrin                                 | 0.133  |
| Enasidenib                                 | 0.132  |
| Etretinate                                 | 0.131  |
| ellagic acid                               | 0.131  |
| Dabrafenib                                 | 0.1305 |
| Verapamil (hydrochloride)                  | 0.13   |
| Bezafibrate                                | 0.1295 |
| Meloxicam                                  | 0.1295 |
| Cortisone                                  | 0.1295 |
| Cefixime                                   | 0.1265 |
| Thiamine nitrate                           | 0.126  |
| Dexrazoxane (Hydrochloride)                | 0.126  |
| Udenafil                                   | 0.1245 |
| Levobetaxolol (hydrochloride)              | 0.1245 |
| Gimeracil                                  | 0.124  |
| Nateglinide                                | 0.124  |
| Setiptiline                                | 0.1235 |
| sulfanilamide                              | 0.1235 |
| Amifostine                                 | 0.123  |
| Ranitidine (hydrochloride)                 | 0.1225 |
| Ipratropium (bromide)                      | 0.122  |
| LEE011 (succinate)                         | 0.1215 |
| Tigecycline                                | 0.1185 |
| Tropisetron                                | 0.1185 |
| Tacrolimus (monohydrate)                   | 0.117  |
| Fomepizole                                 | 0.117  |
| Parecoxib                                  | 0.1165 |
| Dasatinib (hydrochloride)                  | 0.116  |
| Naringin                                   | 0.115  |
| Alverine (citrate)                         | 0.115  |
| Bepotastine (Beslilate)                    | 0.1145 |
| Aminoglutethimide                          | 0.1145 |
| Zanamivir                                  | 0.113  |
| 2-NBDG                                     | 0.112  |
| Benzyl alcohol                             | 0.112  |



|                                     |        |
|-------------------------------------|--------|
| Tizanidine (hydrochloride)          | 0.111  |
| Silodosin                           | 0.111  |
| Metaraminol (tartrate)              | 0.11   |
| Salsalate                           | 0.1085 |
| Polyvinylpyrrolidone                | 0.108  |
| Felbamate                           | 0.1075 |
| Oxantel (pamoate)                   | 0.1055 |
| Mexiletine (hydrochloride)          | 0.1055 |
| Carteolol (hydrochloride)           | 0.1055 |
| Idoxuridine                         | 0.105  |
| Niacin                              | 0.1045 |
| Ketoconazole                        | 0.104  |
| Sevelamer hydrochloride             | 0.1025 |
| Etofylline                          | 0.102  |
| Pancuronium (dibromide)             | 0.101  |
| Doxofylline                         | 0.101  |
| Zolmitriptan                        | 0.101  |
| LN1                                 | 0.1    |
| Carprofen                           | 0.1    |
| Anagrelide (hydrochloride)          | 0.1    |
| Iopanoic acid                       | 0.0995 |
| Proxiphylline                       | 0.0995 |
| Benazepril (hydrochloride)          | 0.0995 |
| Galanthamine (hydrobromide)         | 0.099  |
| Terazosin (hydrochloride dihydrate) | 0.0985 |
| VANILLIN                            | 0.098  |
| Articaine (hydrochloride)           | 0.0975 |
| Sivelestat (sodium tetrahydrate)    | 0.097  |
| Moxalactam (sodium salt)            | 0.0965 |
| Aldicarb                            | 0.0965 |
| Epigallocatechin gallate            | 0.096  |
| Firocoxib                           | 0.096  |
| Tetracycline (hydrochloride)        | 0.0955 |
| (S)-Timolol (Maleate)               | 0.095  |
| $\alpha$ -Tocopherol                | 0.0945 |
| Sildenafil                          | 0.0945 |
| Levobupivacaine (hydrochloride)     | 0.0945 |
| Trazodone (hydrochloride)           | 0.094  |
| tet-hydrocurumin diol               | 0.092  |
| Loxapine                            | 0.092  |
| Diphenmanil (methylsulfate)         | 0.092  |
| Treosulfan                          | 0.092  |
| Promethazine (hydrochloride)        | 0.0915 |
| Esomeprazole (Magnesium trihydrate) | 0.0915 |
| Goserelin (acetate)                 | 0.0915 |

|                                  |        |
|----------------------------------|--------|
| AN-2690                          | 0.0905 |
| Gluconate (Calcium)              | 0.09   |
| Ioversol                         | 0.0895 |
| Mupirocin                        | 0.0895 |
| schisandrin A                    | 0.089  |
| Deferoxamine (mesylate)          | 0.089  |
| Palonosetron (Hydrochloride)     | 0.088  |
| Risedronic acid                  | 0.088  |
| Butenafine (Hydrochloride)       | 0.0875 |
| Ilaprazole                       | 0.0875 |
| Methocarbamol                    | 0.087  |
| Mycophenolic acid                | 0.087  |
| Citalopram (hydrobromide)        | 0.087  |
| Trimethoprim                     | 0.087  |
| Isopro                           | 0.0865 |
| Budesonide                       | 0.0855 |
| Delavirdine (mesylate)           | 0.085  |
| Ifenprodil (tartrate)            | 0.085  |
| Carbazochrome (sodium sulfonate) | 0.085  |
| Ketotifen (fumarate)             | 0.085  |
| Moroxydine (hydrochloride)       | 0.085  |
| Deferiprone                      | 0.0845 |
| Deferasirox                      | 0.0845 |
| Piceatannol                      | 0.084  |
| Homoharringtonine                | 0.083  |
| Alvimopan (dihydrate)            | 0.083  |
| SB203580                         | 0.0825 |
| Tetrahydrozoline (hydrochloride) | 0.0825 |
| Tolbutamide                      | 0.082  |
| Hydroxyurea                      | 0.0795 |
| phloretin                        | 0.0785 |
| Fenbufen                         | 0.0785 |
| Reserpine (hydrochloride)        | 0.078  |
| Cysteamine (Hydrochloride)       | 0.078  |
| Phenindione                      | 0.078  |
| Methscopolamine (bromide)        | 0.0775 |
| Tolfenamic Acid                  | 0.0775 |
| Tamsulosin                       | 0.077  |
| Tadalafil                        | 0.0765 |
| Lenalidomide                     | 0.0765 |
| Crypto chlorogenic acid          | 0.076  |
| Teriflunomide                    | 0.076  |
| Sulfamethoxazole                 | 0.075  |
| Doxazosin (mesylate)             | 0.074  |
| Trifluorothymidine               | 0.074  |

|                              |        |
|------------------------------|--------|
| Tobramycin                   | 0.0735 |
| Ertapenem sodium             | 0.073  |
| Econazole (nitrate)          | 0.0725 |
| Felypressin                  | 0.072  |
| GS-7340 (hemifumarate)       | 0.0715 |
| Pentostatin                  | 0.07   |
| Piroctone olamine            | 0.07   |
| Rutin                        | 0.0695 |
| Prucalopride (succinate)     | 0.069  |
| Pitavastatin (Calcium)       | 0.069  |
| Tiagabine (hydrochloride)    | 0.0685 |
| Fluocinonide                 | 0.0645 |
| Ramosetron (Hydrochloride)   | 0.0645 |
| Zonisamide                   | 0.064  |
| Anastrozole                  | 0.063  |
| Tetrabenazine                | 0.063  |
| Betamipron                   | 0.0625 |
| Mirabegron                   | 0.0605 |
| Temozolomide                 | 0.0605 |
| Capsaicin                    | 0.0605 |
| Alosetron (Hydrochloride)    | 0.0595 |
| Fosinopril (sodium)          | 0.058  |
| Pemetrexed (disodium)        | 0.0575 |
| Betamethasone                | 0.0565 |
| L-Carnitine                  | 0.0565 |
| Entacapone                   | 0.056  |
| Clozapine                    | 0.0555 |
| Methylprednisolone           | 0.055  |
| Cefozopran (hydrochloride)   | 0.0545 |
| Acetohexamide                | 0.054  |
| Brivudine                    | 0.053  |
| Raltegravir (potassium salt) | 0.0525 |
| Methylnaltrexone (Bromide)   | 0.0525 |
| Azaperone                    | 0.051  |
| Phthalylsulfacetamide        | 0.0505 |
| Amlexanox                    | 0.049  |
| Lifitegrast                  | 0.0485 |
| Zaltoprofen                  | 0.0485 |
| Erlotinib                    | 0.048  |
| Fluconazole                  | 0.048  |
| Aspirin                      | 0.0475 |
| Anethole (trithione)         | 0.047  |
| 5-Aminosalicylic acid        | 0.047  |
| Procyclidine (hydrochloride) | 0.047  |
| Warfarin                     | 0.047  |

|                                       |        |
|---------------------------------------|--------|
| Ganciclovir                           | 0.0455 |
| Formestane                            | 0.045  |
| Imatinib                              | 0.0445 |
| Abacavir                              | 0.044  |
| Baclofen                              | 0.044  |
| Lidocaine                             | 0.043  |
| Coniteryl aldehyde                    | 0.042  |
| Avibactam (sodium hydrate)            | 0.041  |
| Sulindac                              | 0.041  |
| Dolasetron (Mesylate hydrate)         | 0.04   |
| Acipimox                              | 0.039  |
| Bendazol                              | 0.039  |
| Mosapride (citrate)                   | 0.0385 |
| Edaravone                             | 0.038  |
| Clonidine (hydrochloride)             | 0.036  |
| Piperazine (malate)                   | 0.033  |
| Diphenylpyraline (hydrochloride)      | 0.0325 |
| Linagliptin                           | 0.0315 |
| Plerixafor (octahydrochloride)        | 0.0295 |
| Resorcinol                            | 0.0295 |
| Naftidrofuryl (oxalate)               | 0.0285 |
| Betahistine (dihydrochloride)         | 0.0285 |
| Dasatinib                             | 0.0255 |
| Acitretin                             | 0.0255 |
| Bucladesine (sodium salt)             | 0.022  |
| Tirofiban (hydrochloride monohydrate) | 0.022  |
| Escitalopram (oxalate)                | 0.022  |
| Alibendol                             | 0.0205 |
| Pyridostigmine (bromide)              | 0.02   |
| D-Pinitol                             | 0.019  |
| Flupirtine (Maleate)                  | 0.019  |
| Tryptophol, 97%                       | 0.0185 |
| Mianserin (hydrochloride)             | 0.0185 |
| Pibrentasvir                          | 0.018  |
| Boceprevir                            | 0.0165 |
| Didanosine                            | 0.0165 |
| Octinoxate                            | 0.016  |
| Phenylpiracetam                       | 0.015  |
| Bumetanide                            | 0.015  |
| Buflomedil (hydrochloride)            | 0.0145 |
| Sunitinib                             | 0.014  |
| Ozagrel (sodium)                      | 0.014  |
| Testosterone (undecanoate)            | 0.014  |
| Carbidopa                             | 0.0125 |
| Fosfomycin (calcium)                  | 0.0115 |

|                                    |             |
|------------------------------------|-------------|
| Hydrocortisone (acetate)           | 0.011       |
| Pramocaine (hydrochloride)         | 0.011       |
| Acetylcholine (chloride)           | 0.011       |
| Cephalexin                         | 0.01        |
| Cariprazine (hydrochloride)        | 0.01        |
| Amoxapine                          | 0.0085      |
| Candesartan                        | 0.008       |
| Tetramisole (hydrochloride)        | 0.0055      |
| Hydrochlorothiazide                | 0.0055      |
| Azilsartan                         | 0.0045      |
| Fenspiride (Hydrochloride)         | 0.004       |
| Etoposide                          | 8.88178E-16 |
| Famotidine                         | -0.0005     |
| Empagliflozin                      | -0.0015     |
| Phytic acid                        | -0.002      |
| 6-Acetamidohexanoic acid           | -0.002      |
| Acetaminophen                      | -0.0025     |
| Lincomycin (hydrochloride hydrate) | -0.0025     |
| Terlipressin                       | -0.004      |
| BCH833                             | -0.0055     |
| Mebhydrolin (napadisylate)         | -0.007      |
| Setiptiline (maleate)              | -0.0075     |
| Prednisolone (21-acetate)          | -0.0075     |
| Proglumide                         | -0.008      |
| Thalidomide                        | -0.0085     |
| Glycerol                           | -0.009      |
| Azlocillin (sodium salt)           | -0.009      |
| gallic acid                        | -0.01       |
| Galanthamine                       | -0.0125     |
| Trimethadione                      | -0.013      |
| Diacerein                          | -0.013      |
| Metronidazole                      | -0.013      |
| Epalrestat                         | -0.0135     |
| Choline (chloride)                 | -0.0145     |
| Diethylcarbamazine (citrate)       | -0.0145     |
| 4-Aminopyridine                    | -0.016      |
| Deoxycholic acid sodium salt       | -0.0165     |
| Chlorzoxazone                      | -0.0165     |
| Propyl gallate                     | -0.017      |
| Raltitrexed                        | -0.019      |
| Alendronate (sodium hydrate)       | -0.0195     |
| Ceftriaxone (sodium salt)          | -0.0195     |
| Chlorhexidine (digluconate)        | -0.0195     |
| Hexamethylenetetramine             | -0.0195     |
| Cefuroxime (sodium)                | -0.0205     |

|                                    |         |
|------------------------------------|---------|
| Lomustine                          | -0.0205 |
| Trapidil                           | -0.0205 |
| Isoniazid                          | -0.0205 |
| Fimasartan                         | -0.0225 |
| Itopride (hydrochloride)           | -0.0225 |
| 17-Hydroxyprogesterone             | -0.0225 |
| Ticlopidine (hydrochloride)        | -0.023  |
| Ambrisentan                        | -0.023  |
| Diazoxide                          | -0.0245 |
| Ibudilast                          | -0.0245 |
| Lamotrigine                        | -0.0245 |
| Streptozocin                       | -0.025  |
| Pyrantel (pamoate)                 | -0.0255 |
| Histamine (phosphate)              | -0.0255 |
| Nabumetone                         | -0.0265 |
| Hydralazine (hydrochloride)        | -0.028  |
| Nizatidine                         | -0.0285 |
| Gallic acid                        | -0.029  |
| DEDS                               | -0.032  |
| Bilastine                          | -0.032  |
| Roxatidine (Acetate Hydrochloride) | -0.033  |
| Plerixafor                         | -0.034  |
| Octreotide (acetate)               | -0.034  |
| Nikethamide                        | -0.034  |
| Safinamide                         | -0.0355 |
| Mezlocillin (sodium)               | -0.0375 |
| Fudosteine                         | -0.0385 |
| Ceftibuten (dihydrate)             | -0.039  |
| VX-809                             | -0.039  |
| Ferulic acid                       | -0.0405 |
| Edrophonium (chloride)             | -0.042  |
| L-Nicotine                         | -0.042  |
| Acetazolamide                      | -0.042  |
| Carboplatin                        | -0.0425 |
| Chlormethine (hydrochloride)       | -0.043  |
| Papaverine (hydrochloride)         | -0.0435 |
| Vilazodone                         | -0.044  |
| Rufinamide                         | -0.0445 |
| Darunavir (Ethanolate)             | -0.045  |
| Metaxalone                         | -0.045  |
| Lesinurad                          | -0.0465 |
| Cisapride                          | -0.047  |
| Gadopentetate (dimeglumine)        | -0.0485 |
| Dexmedetomidine (hydrochloride)    | -0.0485 |
| Protoporphyrin IX                  | -0.049  |

|                                         |         |
|-----------------------------------------|---------|
| Amoxicillin (trihydrate)                | -0.0495 |
| pterostilbene                           | -0.0495 |
| Olsalazine (Disodium)                   | -0.05   |
| D-Panthenol                             | -0.05   |
| Tripelennamine (hydrochloride)          | -0.05   |
| Dolutegravir (sodium)                   | -0.051  |
| Ketorolac (tromethamine salt)           | -0.053  |
| Bemegride                               | -0.054  |
| Silibinin                               | -0.055  |
| Bosentan                                | -0.055  |
| Malathion                               | -0.055  |
| Desogestrel                             | -0.055  |
| Dexchlorpheniramine (maleate)           | -0.0555 |
| Rauwolscine (hydrochloride)             | -0.056  |
| Alcaftadine                             | -0.0565 |
| Azatadine (dimaleate)                   | -0.057  |
| Oxacillin (sodium monohydrate)          | -0.057  |
| Ethamsylate                             | -0.0575 |
| Amygdalin                               | -0.0585 |
| Carbetapentane (citrate)                | -0.061  |
| Spectinomycin (dihydrochloride)         | -0.061  |
| Dirithromycin                           | -0.0615 |
| Ropivacaine (hydrochloride monohydrate) | -0.062  |
| Salicylic acid                          | -0.0625 |
| Cefmetazole (sodium)                    | -0.063  |
| Diphenidol (hydrochloride)              | -0.065  |
| Methimazole                             | -0.0655 |
| Sodium gualenate                        | -0.0655 |
| Bambuterol (hydrochloride)              | -0.068  |
| Deoxycholic acid                        | -0.068  |
| Agomelatine                             | -0.069  |
| Clevudine                               | -0.069  |
| Bifonazole                              | -0.0705 |
| Clindamycin (hydrochloride)             | -0.071  |
| Bendamustine (hydrochloride)            | -0.071  |
| Maprotiline (hydrochloride)             | -0.0715 |
| Velpatasvir                             | -0.074  |
| Apixaban                                | -0.0755 |
| Cefoperazone                            | -0.076  |
| Ozagrel                                 | -0.0765 |
| Allopurinol                             | -0.079  |
| S-(+)-Ketoprofen                        | -0.079  |
| Doripenem (monohydrate)                 | -0.079  |
| Acebutolol (hydrochloride)              | -0.0805 |
| Rivastigmine (tartrate)                 | -0.081  |

|                                        |         |
|----------------------------------------|---------|
| Suramin (sodium salt)                  | -0.0815 |
| 6-Aminocaproic acid                    | -0.082  |
| Cefditoren (Pivoxil)                   | -0.0825 |
| Ketoprofen                             | -0.083  |
| 10-Undecenoic acid (zinc salt)         | -0.083  |
| Valganciclovir (hydrochloride)         | -0.084  |
| delphinidin                            | -0.0845 |
| oltipraz                               | -0.0855 |
| Chlorophyllin                          | -0.0875 |
| Fursultiamine                          | -0.0925 |
| Adapalene                              | -0.0925 |
| Methyl jasmmate                        | -0.093  |
| Moxisylyte (hydrochloride)             | -0.0935 |
| Halothane                              | -0.0935 |
| Dofetilide                             | -0.0935 |
| Gemcitabine (Hydrochloride)            | -0.096  |
| Mephenesin                             | -0.096  |
| Sumatriptan (succinate)                | -0.0965 |
| myricerin                              | -0.097  |
| Amodiaquin (dihydrochloride dihydrate) | -0.0975 |
| Fexofenadine (hydrochloride)           | -0.0975 |
| Piromidic acid                         | -0.098  |
| Ginsenoside Rg2                        | -0.1    |
| Etomidate (hydrochloride)              | -0.1005 |
| Aceclofenac                            | -0.102  |
| Cefoxitin (sodium)                     | -0.104  |
| Dutasteride                            | -0.104  |
| Indinavir (sulfate)                    | -0.1045 |
| Mirtazapine                            | -0.1045 |
| Venlafaxine (hydrochloride)            | -0.1055 |
| Benactyzine hydrochloride              | -0.1055 |
| Atropine (sulfate monohydrate)         | -0.1085 |
| Granisetron (Hydrochloride)            | -0.109  |
| Bosentan (hydrate)                     | -0.1095 |
| Cilostazol                             | -0.1105 |
| Glyacid                                | -0.111  |
| Nortriptyline (hydrochloride)          | -0.111  |
| Famciclovir                            | -0.111  |
| Heptaminol (hydrochloride)             | -0.111  |
| Neomycin (sulfate)                     | -0.1115 |
| Dabigatran (ethyl ester hydrochloride) | -0.112  |
| Ibandronate (Sodium Monohydrate)       | -0.1135 |
| Cromolyn (sodium)                      | -0.1135 |
| Tenoxicam                              | -0.114  |
| Dibucaine                              | -0.1145 |



|                                     |         |
|-------------------------------------|---------|
| Vorinostat                          | -0.116  |
| Protopanaxadiol                     | -0.1165 |
| Trimipramine (maleate)              | -0.117  |
| Metrifonate                         | -0.1185 |
| Ampicillin (sodium)                 | -0.1185 |
| δ-Tocopherol                        | -0.1205 |
| Vildagliptin                        | -0.1205 |
| Fenoldopam (mesylate)               | -0.121  |
| Rb1                                 | -0.122  |
| 3,3',5-Triiodo-L-thyronine (sodium) | -0.122  |
| Chlorphenoxamine                    | -0.122  |
| Vidarabine                          | -0.1235 |
| Isosorbide mononitrate              | -0.1255 |
| Ornipressin                         | -0.1285 |
| Bupivacaine (hydrochloride)         | -0.129  |
| Alogliptin (Benzoate)               | -0.1295 |
| Nicergoline                         | -0.13   |
| Adiphenine (hydrochloride)          | -0.1305 |
| quercitrin hydrate                  | -0.131  |
| LEE011 (succinate hydrate)          | -0.1315 |
| Sulbutiamine                        | -0.1315 |
| Abarelix                            | -0.1325 |
| Cytidine                            | -0.1325 |
| Fenofibric acid                     | -0.1345 |
| Caspofungin (Acetate)               | -0.1345 |
| 3-hydroxytyrosol                    | -0.1355 |
| Methylprednisolone succinate        | -0.1385 |
| Cefsulodin (sodium)                 | -0.1395 |
| Tranilast                           | -0.14   |
| Nedocromil                          | -0.1405 |
| Clinofibrate                        | -0.141  |
| Fasudil (Hydrochloride)             | -0.142  |
| Chlorambucil                        | -0.1425 |
| Levosimendan                        | -0.143  |
| Tocofersolan                        | -0.1435 |
| Procyanidin A2                      | -0.144  |
| Quinine                             | -0.144  |
| Neostigmine (methyl sulfate)        | -0.1445 |
| Azithromycin                        | -0.1465 |
| Oxaceprol                           | -0.148  |
| Kaempferol                          | -0.149  |
| Milrinone                           | -0.149  |
| Lornoxicam                          | -0.1495 |
| Terbutaline (sulfate)               | -0.1505 |
| Clorprenaline hydrochloride         | -0.151  |

|                                       |         |
|---------------------------------------|---------|
| Methylthiouracil                      | -0.156  |
| Flecainide (acetate)                  | -0.1565 |
| Melphalan                             | -0.157  |
| Succinylsulfathiazole                 | -0.1575 |
| MALH116                               | -0.1575 |
| Rabeprazole (sodium)                  | -0.159  |
| Eflornithine (hydrochloride, hydrate) | -0.161  |
| Anagliptin                            | -0.161  |
| Miglitol                              | -0.1615 |
| Azasetron (hydrochloride)             | -0.163  |
| MK-4827 (tosylate)                    | -0.1635 |
| Imipramine (hydrochloride)            | -0.1655 |
| Phenytoin (sodium)                    | -0.166  |
| Hirsute                               | -0.167  |
| Trelagliptin                          | -0.1685 |
| Osalmid                               | -0.1695 |
| Riociguat                             | -0.17   |
| Oxaprozin                             | -0.17   |
| Lecithin                              | -0.172  |
| Decursin                              | -0.1725 |
| Dimesna                               | -0.173  |
| Furosemide                            | -0.173  |
| Verteporfin                           | -0.1755 |
| L-Ornithine                           | -0.1755 |
| Entecavir (monohydrate)               | -0.176  |
| Primidone                             | -0.1765 |
| D-Cycloserine                         | -0.177  |
| Doxapram (hydrochloride hydrate)      | -0.1795 |
| Mizoribine                            | -0.18   |
| Coumesterol                           | -0.181  |
| Apremilast                            | -0.181  |
| Methoxsalen                           | -0.1815 |
| Oseltamivir (phosphate)               | -0.182  |
| LINALYN ISOVALERATE                   | -0.1835 |
| Rofecoxib                             | -0.184  |
| Oxytetracycline                       | -0.185  |
| Trilostane                            | -0.189  |
| Esmolol (hydrochloride)               | -0.189  |
| Rasagiline (mesylate)                 | -0.189  |
| Atenolol                              | -0.19   |
| Chlormezanone                         | -0.192  |
| Citric acid                           | -0.1925 |
| Histamine                             | -0.193  |
| Etoricoxib                            | -0.1945 |
| Mitoxantrone                          | -0.1945 |

|                                                        |         |
|--------------------------------------------------------|---------|
| Guanidine (hydrochloride)                              | -0.1945 |
| Pyrimethamine                                          | -0.196  |
| Milnacipran (hydrochloride)                            | -0.197  |
| Oxytocin (acetate)                                     | -0.1985 |
| Sulfaphenazole                                         | -0.2015 |
| Berberine (chloride hydrate)                           | -0.202  |
| Baricitinib                                            | -0.2025 |
| Hesperetin                                             | -0.2035 |
| Teneligliptin (hydrobromide)                           | -0.2035 |
| Balsalazide                                            | -0.2055 |
| Scopolamine (hydrobromide)                             | -0.209  |
| Ibutilide (fumarate)                                   | -0.2155 |
| Rocuronium (Bromide)                                   | -0.2155 |
| Chlorthalidone                                         | -0.2155 |
| Spironolactone                                         | -0.216  |
| Drospirenone                                           | -0.217  |
| Atomoxetine (hydrochloride)                            | -0.22   |
| Etonogestrel                                           | -0.2205 |
| Noopept                                                | -0.2215 |
| Naproxen                                               | -0.2225 |
| R-(-)-Deprenyl (hydrochloride)                         | -0.223  |
| Levodropropizine                                       | -0.2235 |
| Tetracaine                                             | -0.224  |
| LCZ696                                                 | -0.2255 |
| Voglibose                                              | -0.227  |
| Epirubicin (hydrochloride)                             | -0.227  |
| Troxipide                                              | -0.2285 |
| penta-O-galloy- $\beta$ -glucose (Penta-O-G- $\beta$ ) | -0.2285 |
| Terpin (hydrate)                                       | -0.2295 |
| Ampiroxicam                                            | -0.232  |
| Valacyclovir (hydrochloride)                           | -0.236  |
| Rosiglitazone                                          | -0.2365 |
| Metformin (hydrochloride)                              | -0.237  |
| p-Coumaric acid                                        | -0.2375 |
| Cefprozil (monohydrate)                                | -0.2393 |
| Ruxolitinib                                            | -0.242  |
| UK 14,304 (tartrate)                                   | -0.242  |
| Dolasetron                                             | -0.248  |
| Dimetridazole                                          | -0.25   |
| Bisacodyl                                              | -0.25   |
| Suplatast (Tosilate)                                   | -0.252  |
| Furagin                                                | -0.255  |
| Betaine (hydrochloride)                                | -0.2555 |
| Metamizole (sodium hydrate)                            | -0.257  |
| Midecamycin                                            | -0.269  |

|                                    |         |
|------------------------------------|---------|
| Gadodiamide (hydrate)              | -0.269  |
| Mitoxantrone (dihydrochloride)     | -0.271  |
| Pinitol                            | -0.2765 |
| Darunavir                          | -0.277  |
| Piperacillin (sodium)              | -0.2805 |
| Risedronate (sodium)               | -0.285  |
| Pyrazinamide                       | -0.285  |
| Vigabatrin (Hydrochloride)         | -0.286  |
| Vitamin B12                        | -0.286  |
| Pramiracetam                       | -0.288  |
| Pseudobaptigenin                   | -0.289  |
| Natamycin                          | -0.293  |
| Dichlorisone acetate               | -0.294  |
| Chlorophyllin (sodium copper salt) | -0.2945 |
| Erlotinib (Hydrochloride)          | -0.304  |
| Raspberry ketone                   | -0.308  |
| Eslicarbazepine (acetate)          | -0.308  |
| Ramelteon                          | -0.3085 |
| Halobetasol (propionate)           | -0.3135 |
| Mepivacaine (hydrochloride)        | -0.317  |
| Nicorandil                         | -0.323  |
| Tenofovir (Disoproxil Fumarate)    | -0.331  |
| Idramantone                        | -0.333  |
| Peramivir (trihydrate)             | -0.339  |
| Sulfameter                         | -0.343  |
| Guacetisal                         | -0.346  |
| Lodoxamide                         | -0.35   |
| Meclofenoxate (hydrochloride)      | -0.352  |
| mevinolin                          | -0.3545 |
| Sulfogaiacol                       | -0.365  |
| Resveratrol                        | -0.365  |
| Quercetin                          | -0.3675 |
| Pralatrexate                       | -0.37   |
| Fluvastatin (sodium)               | -0.372  |
| Rutin                              | -0.375  |
| Ginsenoside Re                     | -0.3765 |
| Bromfenac (sodium hydrate)         | -0.3795 |
| Abacavir (sulfate)                 | -0.3815 |
| Ambroxol                           | -0.387  |
| Pidotimod                          | -0.392  |
| Desloratadine                      | -0.394  |
| Irinotecan                         | -0.398  |
| Vismodegib                         | -0.409  |
| Acamprosate (calcium)              | -0.411  |
| Iguratiomod                        | -0.419  |

|                                         |         |
|-----------------------------------------|---------|
| Norepinephrine (bitartrate monohydrate) | -0.419  |
| Cefpirome (sulfate)                     | -0.421  |
| Ofloxacin                               | -0.421  |
| Eicosapentaenoic Acid                   | -0.423  |
| Pranoprofen                             | -0.427  |
| Chenodeoxycholic Acid                   | -0.432  |
| Diclofenac (Sodium)                     | -0.432  |
| Luliconazole                            | -0.432  |
| Prednisolone                            | -0.442  |
| Exemestane                              | -0.455  |
| Bupropion (hydrochloride)               | -0.457  |
| Sulfamethazine                          | -0.457  |
| Theophylline                            | -0.47   |
| Indapamide                              | -0.473  |
| Allantoin                               | -0.476  |
| Etravirine                              | -0.482  |
| Acemetacin                              | -0.487  |
| Retinoic acid                           | -0.488  |
| Benserazide (hydrochloride)             | -0.488  |
| Protocatechuic acid                     | -0.4885 |
| Montelukast (sodium)                    | -0.491  |
| pyridoxine hydrochloride                | -0.4925 |
| Lidocaine (hydrochloride)               | -0.503  |
| Loxapine (succinate)                    | -0.509  |
| Misoprostol                             | -0.517  |
| Meprednisone                            | -0.523  |
| Amiloride hydrochloride dihydrate       | -0.524  |
| Dithranol                               | -0.531  |
| Cefmenoxime (hydrochloride)             | -0.533  |
| Thiamphenicol                           | -0.535  |
| Dorzolamide (hydrochloride)             | -0.535  |
| Lesinurad (sodium)                      | -0.537  |
| Amoxicillin (sodium)                    | -0.539  |
| Niflumic acid                           | -0.55   |
| Chlorpropamide                          | -0.553  |
| Ornidazole                              | -0.561  |
| Enalaprilat (dihydrate)                 | -0.562  |
| Flutamide                               | -0.564  |
| Sotalol (hydrochloride)                 | -0.565  |
| Azelastine (hydrochloride)              | -0.58   |
| Dienogest                               | -0.581  |
| Piperine                                | -0.5935 |
| D-Sorbitol                              | -0.599  |
| Deflazacort                             | -0.611  |
| Clenbuterol (hydrochloride)             | -0.614  |

|                                          |         |
|------------------------------------------|---------|
| Levocarnitine propionate (hydrochloride) | -0.615  |
| Amantadine (hydrochloride)               | -0.617  |
| Naftopidil                               | -0.627  |
| Etodolac                                 | -0.628  |
| Metolazone                               | -0.631  |
| Parecoxib (Sodium)                       | -0.657  |
| Cyclophosphamide (hydrate)               | -0.659  |
| Chromocarb                               | -0.668  |
| Troglitazone                             | -0.668  |
| Terbinafine                              | -0.669  |
| Propylthiouracil                         | -0.669  |
| Taurochenodeoxycholic acid               | -0.677  |
| Prostaglandin E2                         | -0.6995 |
| Molindone (hydrochloride)                | -0.701  |
| Emeramide                                | -0.704  |
| Cyclandelate                             | -0.704  |
| Tofacitinib (citrate)                    | -0.72   |
| Clopidogrel (hydrogen sulfate)           | -0.734  |
| Meptazinol (hydrochloride)               | -0.734  |
| Ceftizoxime (sodium)                     | -0.752  |
| Rivastigmine                             | -0.7547 |
| LEE011                                   | -0.758  |
| Sulfamonomethoxine                       | -0.782  |
| Medroxyprogesterone                      | -0.79   |
| Olmесartan                               | -0.797  |
| Sorafenib                                | -0.811  |
| Tioconazole                              | -0.838  |
| Amitriptyline (hydrochloride)            | -0.848  |
| Clofoctol                                | -0.85   |
| Aniracetam                               | -0.859  |
| Betamethasone dipropionate               | -0.873  |
| Loxoprofen                               | -0.888  |
| MLN2238                                  | -0.895  |
| Benzamil hydrochloride                   | -0.896  |
| Telmisartan                              | -0.9021 |
| Gefarnate                                | -0.918  |
| Moclobemide                              | -0.918  |
| Desoximetasone                           | -0.921  |
| Homatropine (Bromide)                    | -0.947  |
| Phenazopyridine (hydrochloride)          | -0.966  |
| Oxyclozanide                             | -0.967  |
| Lenalidomide (hemihydrate)               | -0.968  |
| Olaparib                                 | -0.979  |
| Tosufloxacin (tosylate hydrate)          | -0.981  |
| Diphenhydramine (hydrochloride)          | -0.989  |

|                                 |         |
|---------------------------------|---------|
| Idarubicin (hydrochloride)      | -0.995  |
| Quetiapine                      | -1.0109 |
| Minaprine                       | -1.016  |
| Imidafenacin                    | -1.066  |
| Danthron                        | -1.067  |
| Amisulpride                     | -1.077  |
| Icotinib (Hydrochloride)        | -1.085  |
| 6-Thioguanine                   | -1.085  |
| Sulfamethizole                  | -1.089  |
| Mestranol                       | -1.098  |
| L-Glutamic acid monosodium salt | -1.099  |
| Bicalutamide                    | -1.145  |
| Ketanserin (tartrate)           | -1.151  |
| Valproic acid (sodium salt)     | -1.163  |
| Pimavanserin                    | -1.169  |
| Tedizolid (phosphate)           | -1.1902 |
| Eltrombopag                     | -1.202  |
| L-Epinephrine (Bitartrate)      | -1.202  |
| Teneligliptin                   | -1.236  |
| Betaxolol                       | -1.255  |
| Nylidrin (hydrochloride)        | -1.271  |
| Tenofovir (Disoproxil)          | -1.28   |
| Pirfenidone                     | -1.304  |
| Cefoselis (sulfate)             | -1.353  |
| Cyclobenzaprine (hydrochloride) | -1.384  |
| Clarithromycin                  | -1.397  |
| Sulfisomidin                    | -1.408  |
| Leflunomide                     | -1.408  |
| Sivelestat                      | -1.4092 |
| Flufenamic acid                 | -1.426  |
| Estropipate                     | -1.432  |
| Aceglutamide                    | -1.441  |
| Nifuroxazide                    | -1.4773 |
| Brompheniramine (maleate)       | -1.495  |
| Belotecan (hydrochloride)       | -1.497  |
| Guanabenz (Acetate)             | -1.507  |
| Cytarabine                      | -1.517  |
| Telbivudine                     | -1.526  |
| Teprenone                       | -1.529  |
| Nandrolone decanoate            | -1.553  |
| Folic acid                      | -1.641  |
| Phentolamine (mesylate)         | -1.678  |
| INT-747                         | -1.704  |
| Glycopyrrolate                  | -1.707  |
| Ademetionine                    | -1.738  |

|                                                               |         |
|---------------------------------------------------------------|---------|
| Neostigmine (Bromide)                                         | -1.745  |
| Erdosteine                                                    | -1.758  |
| Chlorpromazine (hydrochloride)                                | -1.779  |
| Diosmin                                                       | -1.814  |
| (-)-Sparteine (sulfate pentahydrate)                          | -1.816  |
| Pravastatin (sodium)                                          | -1.818  |
| Iproniazid (phosphate)                                        | -1.825  |
| Capecitabine                                                  | -1.832  |
| Lansoprazole                                                  | -1.973  |
| Chlorothiazide                                                | -2.011  |
| Simvastatin                                                   | -2.033  |
| t-4-H-3-mca                                                   | -2.051  |
| Pyrantel (tartrate)                                           | -2.082  |
| Tasimelteon                                                   | -2.094  |
| L-Epinephrine                                                 | -2.117  |
| Sitagliptin (phosphate monohydrate)                           | -2.158  |
| Allyl isothiocyanate                                          | -2.1635 |
| Saxagliptin                                                   | -2.216  |
| Zofenopril (calcium)                                          | -2.233  |
| Mozavaptan                                                    | -2.323  |
| CH5424802 (Hydrochloride)                                     | -2.329  |
| Prednisone                                                    | -2.388  |
| Pargyline (hydrochloride)                                     | -2.4055 |
| Pentoxifylline                                                | -2.44   |
| 2-hydroxycinnamic acid (2-HXC)                                | -2.453  |
| Nelarabine                                                    | -2.4637 |
| Alfuzosin                                                     | -2.5169 |
| Nefazodone (hydrochloride)                                    | -2.519  |
| Butylated Hydroxyanisole (BHA; 2[3]-t-Butyl-4-hydroxyanisole) | -2.546  |
| (R)-(-)-Phenylephrine (hydrochloride)                         | -2.56   |
| Trimethobenzamide hydrochloride                               | -2.574  |
| Sulfalene                                                     | -2.587  |
| Bestatin                                                      | -2.5935 |
| Azelaic acid                                                  | -2.611  |
| Sulfathiazole (sodium)                                        | -2.6143 |
| Ramipril                                                      | -2.6214 |
| Fluocinolone (Acetonide)                                      | -2.6341 |
| Mefloquine (hydrochloride)                                    | -2.664  |
| Doxorubicin (hydrochloride)                                   | -2.75   |
| Formoterol (Fumarate)                                         | -2.765  |
| Dabrafenib (Mesylate)                                         | -2.846  |
| Homatropine (methylbromide)                                   | -2.878  |
| Noscapine                                                     | -3.026  |
| Sapropterin (dihydrochloride)                                 | -3.16   |
| 8-Gingerol                                                    | -3.6635 |



|                                       |         |
|---------------------------------------|---------|
| Novobiocin (Sodium)                   | -3.738  |
| Menadione                             | -3.873  |
| Azaphen (dihydrochloride monohydrate) | -4.3335 |
| Sulpiride                             | -4.432  |
| Tazobactam                            | -4.537  |
